# Supplementary material for: Metabolic Pathway Analysis for Nutrient Removal of the Consortium between <em>C. vulgaris</em> and <em>P. aeruginosa</em>
Source: Preprints.org preprint supplement (doi:10.20944/preprints201903.0002.v1), 2019-03-01
Supplement: Supplementary file 1 [file supplementary]

## Sheet: Appendix A
APPENDIX A.- METABOLIC NETWORK OF THE CO-CULTURE Chlorella vulgaris-Pseudomonas aeruginosa
Reaction number	Metabolism	E.C. number	Enzime	Biochemical reaction	Reference
1	Photosynthesis	PS1-PSII	Photosystem I and II complex	9 Pho > 2 NADPH_Cv + 1 O2_Cv + 12 H_Cv	(Allen, 2002)
2	Photosynthesis	N/A	Not apply	1 Piext > 1 Pi_Cv
3	Photosynthesis	3.6.3.14	Chloroplast ATPase	14 H_Cv + 3 Pi_Cv > 3 ATP_Cv	(Allen, 2002; Kanehisa, 2017)
4	External exchange			1 O2_Cv > 1 O2ext
5	External exchange			1 CO2ext > 1 CO2_Cv
6	Calvin cycle	4.2.1.1	Carbonic acid anhydrase	1 CO2_Cv = 1 HCO3_Cv + 1 H_Cv	(Kanehisa, 2017)
7	Calvin cycle	4.1.1.39	D-ribulose 1,5-diphosphate carboxylase	1 RuBP_c + 1 CO2_Cv > 2 PG3_c	(Kanehisa, 2017)
8	Calvin cycle	2.7.2.3	Phosphoglycerate kinase	1 ATP_Cv + 1 PG3_c = 1 PG13_c	(Kanehisa, 2017)
9	Calvin cycle	1.2.1.13	Glyceraldehyde-3-phosphate dehydrogenase	1 PG13_c + 1 NADPH_Cv + 1 H_Cv > 1 G3P_c + 1 Pi_Cv	(Kanehisa, 2017)
10	Internal exchange			1 G3P_c > 1 G3P_Cv
11	Calvin cycle	5.3.1.1	Triose-phosphate isomerase	1 G3P_c > 1 DAP_c	(Kanehisa, 2017)
12	Calvin cycle	4.1.2.13	Fructose-bisphosphate aldolase	1 DAP_c + 1 G3P_c > 1 FDP_c	(Kanehisa, 2017)
13	Calvin cycle	3.1.3.11	Fructose 1,6-bisphosphatase	1 FDP_c > 1 F6P_c + 1 Pi_Cv	(Kanehisa, 2017)
14	Calvin cycle	5.3.1.9	Glucose-6-phosphate isomerase	1 F6P_c = 1 G6P_c	(Kanehisa, 2017)
15	Calvin cycle	2.2.1.1	Transketolase	1 F6P_c + 1 G3P_c > 1 E4P_c + 1 X5P_c	(Kanehisa, 2017)
16	Calvin cycle	4.1.2.13	Fructose-bisphosphate aldolase	1 DAP_c + 1 E4P_c > 1 S17P_c	(Kanehisa, 2017)
17	Calvin cycle	3.1.3.37	Sedoheptulose-bisphosphatase	1 S17P_c > 1 S7P_c + 1 Pi_Cv	(Kanehisa, 2017)
18	Calvin cycle	2.2.1.1	Transketolase	1 S7P_c + 1 G3P_c > 1 R5P_c + 1 X5P_c	(Kanehisa, 2017)
19	Calvin cycle	5.1.3.1	Ribulose-phosphate 3-epimerase	1 X5P_c > 1 RL5P_c	(Kanehisa, 2017)
20	Calvin cycle	5.3.1.6	Ribose-5-phosphate isomerase	1 R5P_c > 1 RL5P_c	(Kanehisa, 2017)
21	Calvin cycle	2.7.1.19	Phosphoribulokinase	1 ATP_Cv + 1 RL5P_c > 1 RuBP_c	(Kanehisa, 2017)
22	External exchange			1 GLCext > 1 GLC_Cv
23	Glucolysis	2.7.1.1	Hexokinase	1 GLC_Cv + 1 ATP_Cv > 1 G6P_Cv	(Kanehisa, 2017)
24	Glucolysis	5.3.1.9	Glucose-6-phosphate isomerase	1 G6P_Cv = 1 F6P_Cv	(Kanehisa, 2017)
25	Glucolysis	2.7.1.11	6-phosphofructokinase	1 ATP_Cv + 1 F6P_Cv > 1 FDP_Cv	(Kanehisa, 2017)
26	Glucolysis	3.1.3.11	Fructose 1,6-diphosphatase	1 FDP_Cv > 1 F6P_Cv + 1 Pi_Cv	(Kanehisa, 2017)
27	Glucolysis	4.1.2.13	Fructose-bisphosphate aldolase	1 DAP_Cv + 1 G3P_Cv = 1 FDP_Cv	(Kanehisa, 2017)
28	Glucolysis	5.3.1.1	Triose-phosphate isomerase	1 G3P_Cv = 1 DAP_Cv	(Kanehisa, 2017)
29	Glucolysis	1.2.1.12	Glyceraldehyde-3-phosphate dehydrogenase	1 G3P_Cv + 1 Pi_Cv > 1 PG13_Cv + 1 NADH_Cv	(Kanehisa, 2017)
30	Glucolysis	2.7.2.3	Phosphoglycerate kinase	1 ATP_Cv + 1 PG3_Cv = 1 PG13_Cv	(Kanehisa, 2017)
31	Glucolysis	1.2.1.9	Glyceraldehyde-3-phosphate dehydrogenase (NADP+)	1 G3P_Cv > 1 PG3_Cv + 1 NADPH_Cv + 1 H_Cv	(Kanehisa, 2017)
32	Glucolysis	5.4.2.12	2,3-diphosphoglycerate-independent phosphoglycerate mutase	1 PG3_Cv = 1 PG2_Cv	(Kanehisa, 2017)
33	Glucolysis	4.2.1.11	Enolase	1 PG2_Cv = 1 PEP_Cv	(Kanehisa, 2017)
34	Glucolysis	2.7.1.40	Pyruvate kinase	1 PEP_Cv > 1 ATP_Cv + 1 PYR_Cv	(Kanehisa, 2017)
35	Glucolysis	1.2.4.1	Pyruvate dehydrogenase (acetyl-transferring)	1 PYR_Cv + 1 TPP_Cv > 1 T2hPP_Cv + 1 CO2_Cv	(Kanehisa, 2017)
36	Glucolysis	4.1.1.1	Pyruvate decarboxylase	1 T2hPP_Cv > 1 ACT_Cv + 1 TPP_Cv	(Kanehisa, 2017)
37	Glucolysis	1.2.1.3	Aldehyde dehydrogenase (NAD+)	1 ACT_Cv = 1 AC_Cv + 1 NADH_Cv	(Kanehisa, 2017)
38	Glucolysis	6.2.1.1	Acetyl-CoA synthetase	1 ATP_Cv + 1 AC_Cv > 1 ACCOA_Cv	(Kanehisa, 2017)
39	Krebs cycle	6.4.1.1	Pyruvate carboxylase	1 ATP_Cv + 1 PYR_Cv + 1 HCO3_Cv > 1 Pi_Cv + 1 OA_Cv	(Kanehisa, 2017)
40	Krebs cycle	2.3.3.1	Citrate (Si)-synthase	1 ACCOA_Cv + 1 OA_Cv = 1 CIT_Cv	(Kanehisa, 2017)
41	Krebs cycle	4.2.1.3	Aconitate hydratase	1 CIT_Cv = 1 ACO_Cv	(Kanehisa, 2017)
42	Krebs cycle	4.2.1.3	Aconitate hydratase	1 ACO_Cv =1 ICIT_Cv	(Kanehisa, 2017)
43	Krebs cycle	1.1.1.41	Isocitrate dehydrogenase (NAD+)	1 ICIT_Cv = 1 AKG_Cv + 1 CO2_Cv + 1 NADH_Cv + 1 H_Cv	(Kanehisa, 2017)
44	Krebs cycle	1.2.4.2	2-oxoglutarate dehydrogenase	1 AKG_Cv + 1 TPP_Cv > 1 T3hPP_Cv + 1 CO2_Cv	(Kanehisa, 2017)
45	Krebs cycle	1.2.4.2	2-oxoglutarate dehydrogenase	1 T3hPP_Cv + 1 EN6_Cv > 1 SSE_Cv + 1 TPP_Cv	(Kanehisa, 2017)
46	Krebs cycle	2.3.1.61	2-oxoglutarate dehydrogenase	1 SUCCOA_Cv + 1 EN6d_Cv = 1 SSE_Cv	(Kanehisa, 2017)
47	Krebs cycle	1.8.1.4	Dihydrolipoyllysine-residue succinyltransferase	1 EN6d_Cv = 1 EN6_Cv + 1 NADH_Cv + 1 H_Cv	(Kanehisa, 2017)
48	Krebs cycle	6.2.1.5	Succinyl-CoA synthetase	1 Pi_Cv + 1 SUCCOA_Cv = 1 SUC_Cv + 1 ATP_Cv	(Kanehisa, 2017)
49	Krebs cycle	1.3.5.1	Succinate dehydrogenase	1 SUC_Cv = 1 FUM_Cv	(Kanehisa, 2017)
50	Krebs cycle	4.2.1.2	Fumarate hydratase	1 FUM_Cv = 1 MAL_Cv	(Kanehisa, 2017)
51	Krebs cycle	1.1.1.37	Malate dehydrogenase	1 MAL_Cv = 1 OA_Cv + 1 NADH_Cv + 1 H_Cv	(Kanehisa, 2017)
52	Krebs cycle	4.1.1.49	Phosphoenolpyruvate carboxykinase (ATP)	1 ATP_Cv + 1 OA_Cv > 1 PEP_Cv + 1 CO2_Cv	(Kanehisa, 2017)
53	Pentose Phosphate	1.1.1.49	D-glucose 6-phosphate dehydrogenase	1 G6P_Cv > 1 G15L6P_Cv + 1 NADPH_Cv + 1 H_Cv	(Kanehisa, 2017)
54	Pentose Phosphate	3.1.1.31	6-phosphogluconolactonase	1 G15L6P_Cv > 1 GL6P_Cv	(Kanehisa, 2017)
55	Pentose Phosphate	1.1.1.44	6-phosphogluconic dehydrogenase	1 GL6P_Cv > 1 RL5P_Cv + 1 CO2_Cv + 1 NADPH_Cv + 1 H_Cv	(Kanehisa, 2017)
56	Pentose Phosphate	5.3.1.6	Ribose-5-phosphate isomerase	1 R5P_Cv = 1 RL5P_Cv	(Kanehisa, 2017)
57	Pentose Phosphate	5.1.3.1	Ribulose-phosphate 3-epimerase	1 X5P_Cv = 1 RL5P_Cv	(Kanehisa, 2017)
58	Pentose Phosphate	2.2.1.1	Transketolase	1 F6P_Cv + 1 G3P_Cv = 1 E4P_Cv + 1 X5P_Cv	(Kanehisa, 2017)
59	Pentose Phosphate	2.2.1.1	Transketolase	1 S7P_Cv + 1 G3P_Cv = 1 R5P_Cv + 1 X5P_Cv	(Kanehisa, 2017)
60	Pentose Phosphate	2.2.1.2	Transketolase	1 S7P_Cv + 1 G3P_Cv = 1 E4P_Cv + 1 F6P_Cv	(Kanehisa, 2017)
61	Pentose Phosphate	2.7.6.1	Ribose-phosphate pyrophosphokinase	1 ATP_Cv + 1 R5P_Cv = 1 PRPP_Cv	(Kanehisa, 2017)
62	Fatty acid biosynthesis			7 ACCOA_Cv + 6 ATP_Cv + 6 HCO3_Cv + 12 NADPH_Cv > 6 Pi_Cv + 6 CO2_Cv + 1 C14:0CoA
63	Fatty acid biosynthesis			8 ACCOA_Cv + 7 ATP_Cv + 7 HCO3_Cv + 14 NADPH_Cv > 7 Pi_Cv + 7 CO2_Cv + 1 C16:0CoA
64	Fatty acid biosynthesis			8 ACCOA_Cv + 7 ATP_Cv + 7 HCO3_Cv + 15 NADPH_Cv + 1 O2_Cv > 7 Pi_Cv + 7 CO2_Cv + 1 C16:1CoA
65	Fatty acid biosynthesis			8 ACCOA_Cv + 7 ATP_Cv + 7 HCO3_Cv + 16 NADPH_Cv + 2 O2_Cv > 7 Pi_Cv + 7 CO2_Cv + 1 C16:2CoA
66	Fatty acid biosynthesis			8 ACCOA_Cv + 7 ATP_Cv + 7 HCO3_Cv + 17 NADPH_Cv + 3 O2_Cv > 7 Pi_Cv + 7 CO2_Cv + 1 C16:3CoA
67	Fatty acid biosynthesis			9 ACCOA_Cv + 8 ATP_Cv + 8 HCO3_Cv + 16 NADPH_Cv > 8 Pi_Cv + 8 CO2_Cv + 1 C18:0CoA
68	Fatty acid biosynthesis			9 ACCOA_Cv + 8 ATP_Cv + 8 HCO3_Cv + 17 NADPH_Cv + 1 O2_Cv > 8 Pi_Cv + 8 CO2_Cv + 1 C18:1CoA
69	Fatty acid biosynthesis			9 ACCOA_Cv + 8 ATP_Cv + 8 HCO3_Cv + 18 NADPH_Cv + 2 O2_Cv > 8 Pi_Cv + 8 CO2_Cv + 1 C18:2CoA
70	Fatty acid biosynthesis			9 ACCOA_Cv + 8 ATP_Cv + 8 HCO3_Cv + 19 NADPH_Cv + 3 O2_Cv > 8 Pi_Cv + 8 CO2_Cv + 1 C18:3CoA
71	Fatty acid biosynthesis			6 C14:0CoA + 250 C16:0CoA + 20 C16:1CoA + 100 C16:2CoA + 20 C16:3CoA + 4 C18:0CoA + 160 C18:1CoA + 240 C18:2CoA + 200 C18:3CoA > 1000 AcylCoA	(Petkov and Garcia, 2007)
72	Fatty acid biosynthesis	2.3.1.20	Diacylglycerol O-acyltransferase	2 NADH_Cv + 1 PG3_Cv + 3 AcylCoA >1 Pi_Cv + 1 TAG_Cv	(Kanehisa, 2017)
73	Oxidative phosphorylation			2 NADH_Cv + 1 O2_Cv > 20 H_m	(Nelson and Cox, 2005)
74	Oxidative phosphorylation	3.6.3.14	ATP synthase	1 Pi_Cv + 3 H_m > 1 ATP_Cv	(Kanehisa, 2017)
75	Assimilation of Nitrogen	NR, 1.7.7.1	NADH:nitrate oxidoreductase, ferredoxin-nitrite reductase	1 NO3ext + 1 NADH_Cv + 3 NADPH_Cv + 5 H_Cv > 1 NH3_Cv	(Yang, et al. 2000, Kanehisa, 2017)
76	Assimilation of Nitrogen	1.4.1.4	Glutamate dehydrogenase (NADP+)	1 AKG_Cv + 1 NH3_Cv + 1 NADPH_Cv + 1 H_Cv = 1 Glu_Cv	(Kanehisa, 2017)
77	Assimilation of Nitrogen	6.3.1.2	Glutamine synthetase	1 ATP_Cv + 1 Glu_Cv + 1 NH3_Cv > 1 Pi_Cv + 1 Gln_Cv	(Kanehisa, 2017)
78	Asimilación de Nitrógeno	1.4.1.14	Glutamate synthase (NADPH/NADH)	1 Gln_Cv + 1 AKG_Cv + 1 NADH_Cv + 1 H_Cv > 2 Glu_Cv	(Kanehisa, 2017)
79	Amino acid biosynthesis: Alanine	2.6.1.2	Alanine transaminase	1 Ala_Cv + 1 AKG_Cv = 1 PYR_Cv + 1 Glu_Cv	(Kanehisa, 2017)
80	Amino acid biosynthesis: Aspartate	2.6.1.1	Aspartate transaminase	1 Asp_Cv + 1 AKG_Cv = 1 OA_Cv + 1 Glu_Cv	(Kanehisa, 2017)
81	Amino acid biosynthesis: Serine	1.1.1.95	3-phosphoglycerate dehydrogenase	1 PG3_Cv = 1 PP3_Cv + 1 NADH_Cv	(Kanehisa, 2017)
82	Amino acid biosynthesis: Serine	2.6.1.52	Phosphoserine aminotransferase	1 Pser_Cv + 1 AKG_Cv = 1 PP3_Cv + 1 Glu_Cv	(Kanehisa, 2017)
83	Amino acid biosynthesis: Serine	3.1.3.3	Phosphoserine phosphatase	1 Pser_Cv > 1 Ser_Cv + 1 Pi_Cv	(Kanehisa, 2017)
84	Amino acid biosynthesis: Glycine			1 PG3_Cv + 1 NH3_Cv + 1 NADPH_Cv > 1 NADH_Cv + 1 Pi_Cv + 1 Gly_Cv	(Stephanopoulos et al.,1998)
85	Amino acid biosynthesis: Homoserin	1.1.1.3	Homoserine dehydrogenase	1 Hser_Cv = 1 ASPSALD_Cv + 1 NADH_Cv + 1 H_Cv	(Kanehisa, 2017)
86	Amino acid biosynthesis: Homoserin	2.7.1.39	Homoserine kinase	1 Hser_Cv + 1 ATP_Cv > 1 PHser_Cv	(Kanehisa, 2017)
87	Amino acid biosynthesis: Homoserin	4.2.3.1	Threonine synthase	1 PHser_Cv > 1 Thr_Cv + 1 Pi_Cv	(Kanehisa, 2017)
88	Amino acid biosynthesis: Proline			1 AKG_Cv + 1 NH3_Cv + 1 ATP_Cv + 3 NADPH_Cv > 1 Pi_Cv + 1 Prol_Cv	(Stephanopoulos et al.,1998)
89	Amino acid biosynthesis: Arginine			1 AKG_Cv + 7 ATP_Cv + 4 NADPH_Cv + 4 NH3_Cv > 1 NADH_Cv + 7 Pi_Cv + 1 Arg_Cv	(Stephanopoulos et al.,1998)
90	Amino acid biosynthesis: Cysteine	2.3.1.30	Serine O-acetyltransferase	1 Ser_Cv + 1 ACCOA_Cv > 1 Aser_Cv	(Kanehisa, 2017)
91	Sulphate assimilation			1 SO4ext > 1 SO4_Cv
92	Amino acid biosynthesis: Cysteine	2.5.1.47	Cysteine synthase	1 Aser_Cv + 1 SO4_Cv > 1 Cys_Cv + 1 AC_Cv	(Kanehisa, 2017)
93	Amino acid biosynthesis: Histidine			1 R5P_Cv + 6 ATP_Cv + 1 NADPH_Cv + 3 NH3_Cv > 6 Pi_Cv + 3 NADH_Cv + 1 His_Cv	(Stephanopoulos et al.,1998)
94	Amino acid biosynthesis: Isoleucine			1 OA_Cv + 1 PYR_Cv + 2 ATP_Cv + 5 NADPH_Cv + 1 NH3_Cv > 2 Pi_Cv + 1 Iso_Cv	(Stephanopoulos et al.,1998)
95	Amino acid biosynthesis: Leucine			2 PYR_Cv + 1 ACCOA_Cv + 2 NADPH_Cv + 1 NH3_Cv > 1 NADH_Cv + 1 Leu_Cv	(Stephanopoulos et al.,1998)
96	Amino acid biosynthesis: Lysine	2.7.2.4	Aspartate kinase	1 ATP_Cv + 1 Asp_Cv > 1 Pasp_Cv	(Kanehisa, 2017)
97	Amino acid biosynthesis: Lysine	1.2.1.11	Aspartate-semialdehyde dehydrogenase	1 Pasp_Cv + 1 NADPH_Cv + 1 H_Cv > 1 ASPSALD_Cv + 1 Pi_Cv	(Kanehisa, 2017)
98	Amino acid biosynthesis: Lysine	4.3.3.7	4-hydroxy-tetrahydrodipicolinate synthase	1 Asp_Cv + 1 PYR_Cv > 1 sHTHP_Cv	(Kanehisa, 2017)
99	Amino acid biosynthesis: Lysine	1.17.1.8	4-hydroxy-tetrahydrodipicolinate reductase	1 sHTHP_Cv + 1 NADH_Cv + 1 H_Cv > 1 HTHP_Cv	(Kanehisa, 2017)
100	Amino acid biosynthesis: Lysine	2.6.1.83	LL-diaminopimelate aminotransferase	1 HTHP_Cv + 1 Glu_Cv > 1 DIAMPIM_Cv + 1 AKG_Cv	(Kanehisa, 2017)
101	Amino acid biosynthesis: Lysine	5.1.1.7	Diaminopimelate epimerase	1 DIAMPIM_Cv > 1 MDIAMPIM_Cv	(Kanehisa, 2017)
102	Amino acid biosynthesis: Lysine	4.1.1.20	Diaminopimelate decarboxylase	1 MDIAMPIM_Cv > 1 Lys_Cv + 1 CO2_Cv	(Kanehisa, 2017)
103	Amino acid biosynthesis: Methionine			1 OA_Cv + 7 ATP_Cv + 8 NADPH_Cv + 1 NH3_Cv + 1 SO4_Cv > 7 Pi_Cv + 1 Met_Cv	(Stephanopoulos et al.,1998)
104	Amino acid biosynthesis: Phenylalanine			2 PEP_Cv + 1 E4P_Cv + 1 ATP_Cv + 2 NADPH_Cv + 1 NH3_Cv > 1 Pi_Cv + 1 Phe_Cv	(Stephanopoulos et al.,1998)
105	Amino acid biosynthesis: Tryptophan	4.1.3.27	Anthranilate synthase	1 CHOR_Cv + 1 NH3_Cv > 1 VL1_Cv + 1 PYR_Cv	(Kanehisa, 2017)
106	Amino acid biosynthesis: Tryptophan	2.4.2.18	Anthranilate phosphoribosyltransferase	1 VL1_Cv + 1 PRPP_Cv > 1 VL15P_Cv	(Kanehisa, 2017)
107	Amino acid biosynthesis: Tryptophan	5.3.1.24	Phosphoribosylanthranilate isomerase	1 VL15P_Cv > 1 CD5P_Cv	(Kanehisa, 2017)
108	Amino acid biosynthesis: Tryptophan	4.1.1.48	Indole-3-glycerol-phosphate synthase	1 CD5P_Cv > 1 I3GP_Cv + 1 CO2_Cv	(Kanehisa, 2017)
109	Amino acid biosynthesis: Tryptophan	4.2.1.20	Tryptophan synthase	1 Ser_Cv + 1 I3GP_Cv > 1 Trp_Cv + 1 G3P_Cv	(Kanehisa, 2017)
110	Amino acid biosynthesis: Tyrosine	2.5.1.54	3-deoxy-7-phosphoheptulonate synthase	1 PEP_Cv + 1 E4P_Cv > 1 DAHP_Cv + 1 Pi_Cv	(Kanehisa, 2017)
111	Amino acid biosynthesis: Tyrosine	4.2.3.4	3-dehydroquinate synthase	1 DAHP_Cv > 1 DHQ_Cv + 1 Pi_Cv	(Kanehisa, 2017)
112	Amino acid biosynthesis: Tyrosine	4.2.1.10	3-dehydroquinate dehydratase	1 DHQ_Cv > 1 DHSK_Cv	(Kanehisa, 2017)
113	Amino acid biosynthesis: Tyrosine	1.1.1.25	Shikimate dehydrogenase	1 DHSK_Cv + 1 NADPH_Cv + 1 H_Cv > 1 Shi_Cv	(Kanehisa, 2017)
114	Amino acid biosynthesis: Tyrosine	2.7.1.71	Shikimate kinase	1 ATP_Cv + 1 Shi_Cv > 1 Shi3P_Cv	(Kanehisa, 2017)
115	Amino acid biosynthesis: Tyrosine	2.5.1.19	3-phosphoshikimate 1-carboxyvinyltransferase	1 PEP_Cv + 1 Shi3P_Cv > 1 Pi_Cv + 1 Shi35P_Cv	(Kanehisa, 2017)
116	Amino acid biosynthesis: Tyrosine	4.2.3.5	Chorismate synthase	1 Shi35P_Cv > 1 CHOR_Cv + 1 Pi_Cv	(Kanehisa, 2017)
117	Amino acid biosynthesis: Tyrosine	5.4.99.5	Chorismate mutase	1 CHOR_Cv > 1 PRE_Cv	(Kanehisa, 2017)
118	Amino acid biosynthesis: Tyrosine	2.6.1.78	Aspartate---prephenate aminotransferase	1 PRE_Cv + 1 Asp_Cv > 1 OA_Cv + 1 ARO_Cv	(Kanehisa, 2017)
119	Amino acid biosynthesis: Tyrosine	1.3.1.78	Arogenate dehydrogenase (NADP+)	1 ARO_Cv > 1 Tyr_Cv + 1 CO2_Cv + 1 NADPH_Cv + 1 H_Cv	(Kanehisa, 2017)
120	Amino acid biosynthesis: Valine			2 PYR_Cv + 2 NADPH_Cv + 1 NH3_Cv > 1 Val_Cv	(Stephanopoulos et al.,1998)
121	Nucleic acid synthesis			1 PG3_Cv + 1 R5P_Cv + 9 ATP_Cv + 1 NADPH_Cv + 5 NH3_Cv > 9 Pi_Cv + 3 NADH_Cv + 1 AMP_Cv	(Stephanopoulos et al.,1998)
122	Nucleic acid synthesis			1 PG3_Cv + 1 R5P_Cv + 11 ATP_Cv + 5 NH3_Cv > 11 Pi_Cv + 3 NADH_Cv + 1 GMP_Cv	(Stephanopoulos et al.,1998)
123	Nucleic acid synthesis			1 OA_Cv + 1 R5P_Cv + 5 ATP_Cv + 1 NADPH_Cv + 2 NH3_Cv > 5 Pi_Cv + 1 UMP_Cv	(Stephanopoulos et al.,1998)
124	Nucleic acid synthesis			1 OA_Cv + 1 R5P_Cv + 7 ATP_Cv + 1 NADPH_Cv + 3 NH3_Cv > 5 Pi_Cv + 1 CMP_Cv	(Stephanopoulos et al.,1998)
125	Nucleic acid synthesis			1 PG3_Cv + 1 R5P_Cv + 9 ATP_Cv + 2 NADPH_Cv + 5 NH3_Cv > 9 Pi_Cv + 3 NADH_Cv + 1 dAMP_Cv	(Stephanopoulos et al.,1998)
126	Nucleic acid synthesis			1 PG3_Cv + 1 R5P_Cv + 11 ATP_Cv + 1 NADPH_Cv + 5 NH3_Cv > 11 Pi_Cv + 3 NADH_Cv + 1 dGMP_Cv	(Stephanopoulos et al.,1998)
127	Nucleic acid synthesis			1 OA_Cv + 1 R5P_Cv + 5 ATP_Cv + 3 NADPH_Cv + 2 NH3_Cv > 5 Pi_Cv + 1 dTMP_Cv	(Stephanopoulos et al.,1998)
128	Nucleic acid synthesis			1 OA_Cv + 1 R5P_Cv + 7 ATP_Cv + 2 NADPH_Cv + 3 NH3_Cv > 7 Pi_Cv + 1 dCMP_Cv	(Stephanopoulos et al.,1998)
129	Synthesis of carbohydrates			1 G6P_Cv + 1 ATP_Cv > 1 Pi_Cv + 1 UDPGLC_Cv	(Stephanopoulos et al.,1998)
130	Synthesis of carbohydrates			1 G6P_Cv + 1 ATP_Cv > 1 Pi_Cv + 1 UDPGAL_Cv	(Stephanopoulos et al.,1998)
131	Synthesis of carbohydrates			1 F6P_Cv + 1 ACCOA_Cv + 2 ATP_Cv + 1 NH3_Cv > 2 Pi_Cv + 1 UDPNAG_Cv	(Stephanopoulos et al.,1998)
132	Synthesis of glycerophospholipids			1 DAP_Cv + 2 AcylCoA + 1 NADH_Cv + 2 ATP_Cv + 1 Ser_Cv > 1 CO2_Cv + 1 PE_Cv	(Stephanopoulos et al.,1998)
133	Synthesis of glycerophospholipids			1 DAP_Cv + 1 PG3_Cv + 1 NADPH_Cv + 2 ATP_Cv + 1 NH3_Cv + 2 AcylCoA > 1 PC_Cv	(Stephanopoulos et al.,1998)
134	Synthesis of glycerophospholipids			2 DAP_Cv + 2 NADH_Cv + 2 AcylCoA + 2 ATP_Cv > 1 Pi_Cv + 1 PG_Cv	(Stephanopoulos et al.,1998)
135	Synthesis of chlorophyll			4 PYR_Cv + 4 G3P_Cv + 14 ATP_Cv + 29 NADPH_Cv + 8 Glu_Cv + 7 O2_Cv + 1 Mg > 10 CO2_Cv + 4 NH3_Cv + 20 Pi_Cv + 1 Chla	Sum of total reactions in Kanehisa, 2017.
136	Synthesis of chlorophyll			4 PYR_Cv + 4 G3P_Cv + 14 ATP_Cv + 31 NADPH_Cv + 8 Glu_Cv + 9 O2_Cv + 1 Mg > 10 CO2_Cv + 4 NH3_Cv + 20 Pi_Cv + 1 Chlb	Sum of total reactions in Kanehisa, 2017.
137	Maltose synthesis	2.7.7.27	glucose-1-phosphate adenylyltransferase	10 G6P_c + 20 ATP_Cv > 3 ALMI_c	(Yang, et al. 2000)
138	Maltose synthesis	3.2.1.2	glycogenase	1 ALMI_c > 200 MALT_Cv	Polysaccharides have no defined molecular mass, but are composed of at least 200 disaccharide residues (Nelson and Cox, 2005)
139	External exchange			1 MALT_Cv > 1 MALText
140	Synthesis of macromolecules			0.79 AMP_Cv + 0.81 UMP_Cv + 0.89 GMP_Cv + 0.61 CMP_Cv + 7.44 ATP_Cv > 7.44 Pi_Cv + 1 RNA_Cv	mm RNA of 323 g/mol (Stephanopouloset al., 1998)
141	Synthesis of macromolecules			0.79 dAMP_Cv + 0.79 dTMP_Cv + 0.82 dGMP_Cv + 0.82 dCMP_Cv + 11 ATP_Cv > 11 Pi_Cv + 1 DNA_Cv	mm DNA of 310 g/mol (Stephanopoulos et al., 1998)
142	Synthesis of macromolecules			0.612 UDPGLC_Cv + 0.102 UDPGAL_Cv + 0.286 UDPNAG_Cv > 0.578 CARBH	mm de CARBH de 577.77 (Brown et al.,1997). Sialve et al., takes a value of MM of (162)n g/mol (2009)
143	Synthesis of macromolecules			0.63 TAG_Cv + 0.048 PG_Cv + 0.204 PC_Cv + 0.118 PE_Cv > 0.884 LIPID	63% mol TAG y 37% mol of total phospholipids (PC, PG, PE; Tsuzuki et al., 1990).Of the total phospholipids 32% is PE, 13% PG and 55% PC (Tsuzuki et al., 1990).MM LIPID = 884 g/mol (Sialve et al.,2009). Because the MM of phospholipids and glycerolipids is very similar, the mass% is taken as% mol.
144	Synthesis of macromolecules			0.765 Prol_Cv + 0.126 Trp_Cv + 0.588 Asp_Cv + 0.648 Glu_Cv + 0.384 Ser_Cv + 0.298 Thr_Cv + 1.01 Gly_Cv + 1.057 Ala_Cv + 0.574 Val_Cv + 0.569 Leu_Cv + 0.326 Iso_Cv + 0.207 Phe_Cv + 0.189 Tyr_Cv + 0.765 Met_Cv + 0.02 Cys_Cv + 1.109 Arg_Cv + 0.26 His_Cv + 0.854 Lys_Cv + 39.1 ATP_Cv > 1.164 PRO_Cv + 39.1 Pi_Cv	Asn and Gln are omitted (Fowden 1951a,1951b). The value of 9.1 mmol of total amino acid is multiplied by each mole fraction of individual amino acid (Stephanopoulos et al., 1998). The value of PRO is in grams, the MM of PRO is taken as 127.89 g/mol (Fowden 1951a,b; Sialve et al. takes value from 109.5 g/mol, 2009)
145	Synthesis of chlorophyll			2.5 Chla + 1 Chlb > 3.136 CHL	Razón de 2.5 Chla / Chlb (El-Sheekh y Fathy, 2009)
146	External exchange			1 PO4ext > 1 PO4_Cv
147	Biomass synthesis (C. vulgaris)			95 ATP_Cv + 0.01131 K + 0.00531 Mg + 0.04214 PO4_Cv + 0.00916 SO4_Cv + 0.0027 Fe + 0.00039 Ca + 0.00003 Zn + 0.00002 Cu + 0.00006 Mn + 0.00275 DNA_Cv + 0.02473 RNA_Cv + 0.15572 CARBH + 0.20152 LIPID + 0.53128 PRO_Cv + 0.01374 CHL > 1 BIO_Cv + 95 Pi_Cv	For biomass composition most metabolites are obtained from Sialve et al. (2009). Total nucleic acids of 3%, (90% RNA; Janczyk et al.,2005). 1.3 % CHL, MM Chla = 892.5, MM Chlb = 906.5 (Kralovec, 2005; El-Sheekh y Fathy, 2009)
148	Metabolism of starch			1 MALText > 1 MALT_P
149	Metabolism of starch	5.4.99.16	Maltose alpha-D-glucosyltransferase	1 MALT_P > 1 T_P	(Kanehisa, 2017)
150	Metabolism of starch	3.2.1.28	Trehalase	1 T_P > 2 GLC_P	(Oberhardt, et al. 2008)
151	Glucolysis / Gluconeogenesis			1 GLCext > 1 GLC_P
152	Glucolysis / Gluconeogenesis	2.7.1.2	Glucokinase	1 GLC_P + 1 ATP_P > 1 G6P_P	(Kanehisa, 2017)
153	Glucolysis / Gluconeogenesis	5.3.1.9	Glucose-6-phosphate isomerase	1 G6P_P = 1 F6P_P	(Kanehisa, 2017)
154	Glucolysis / Gluconeogenesis	3.1.3.11	Fructose 1,6-diphosphatase	1 FDP_P > 1 F6P_P + 1 Pi_P	(Kanehisa, 2017)
155	Glucolysis / Gluconeogenesis	4.1.2.13	Fructose-bisphosphate aldolase	1 FDP_P = 1 G3P_P + 1 DAP_P	(Kanehisa, 2017)
156	Glucolysis / Gluconeogenesis	5.3.1.1	Triose-phosphate isomerase	1 DAP_P = 1 G3P_P	(Kanehisa, 2017)
157	Glucolysis / Gluconeogenesis	1.2.1.12	Glyceraldehyde-3-phosphate dehydrogenase	1 G3P_P + 1 Pi_P = 1 PG13_P + 1 NADH_P + 1 H_P	(Kanehisa, 2017)
158	Glucolysis / Gluconeogenesis	2.7.2.3	Phosphoglycerate kinase	1 ATP_P + 1 PG3_P = 1 PG13_P	(Kanehisa, 2017)
159	Glucolysis / Gluconeogenesis	1.2.1.9	Glyceraldehyde-3-phosphate dehydrogenase (NADP+)	1 G3P_P > 1 PG3_P + 1 NADPH_P + 1 H_P	(Kanehisa, 2017)
160	Glucolysis / Gluconeogenesis	5.4.2.12	2,3-diphosphoglycerate-independent phosphoglycerate mutase	1 PG3_P = 1 PG2_P	(Kanehisa, 2017)
161	Glucolysis / Gluconeogenesis	4.2.1.11	Enolase	1 PG2_P = 1 PEP_P	(Kanehisa, 2017)
162	Glucolysis / Gluconeogenesis	2.7.1.40	Pyruvate kinase	1 PEP_P > 1 ATP_P + 1 PYR_P	(Kanehisa, 2017)
163	Glucolysis / Gluconeogenesis	1.2.4.1	Pyruvate dehydrogenase	1 PYR_P + 1 TPP_P > 1 T2hPP_P + 1 CO2_P	(Kanehisa, 2017)
164	Glucolysis / Gluconeogenesis	1.2.4.1	Pyruvate dehydrogenase	1 T2hPP_P + 1 EN6_P > 1 EN6s + 1 TPP_P	(Kanehisa, 2017)
165	Glucolysis / Gluconeogenesis	2.3.1.12	Pyruvate dehydrogenase	1 EN6s = 1 EN6_P + 1 ACCOA_P	(Kanehisa, 2017)
166	Glucolysis / Gluconeogenesis	1.8.1.4	Dihydrolipoyl dehydrogenase	1 EN6d_P = 1 EN6_P + 1 NADH_P + 1 H_P	(Kanehisa, 2017)
167	Glucolysis / Gluconeogenesis	4.1.1.49	Phosphoenolpyruvate carboxykinase (ATP)	1 ATP_P + 1 OA_P > 1 PEP_P + 1 CO2_P	(Kanehisa, 2017)
168	Glucolysis / Gluconeogenesis	6.4.1.1	Pyruvate carboxylase	1 ATP_P + 1 PYR_P + 1 CO2_P > 1 OA_P + 1 Pi_P	(Kanehisa, 2017)
169	Krebs cycle	2.3.3.1	Citrate (Si)-synthase	1 ACCOA_P + 1 OA_P > 1 CIT_P	(Kanehisa, 2017)
170	Krebs cycle	4.2.1.3	Aconitate hydratase	1 CIT_P = 1 ICIT_P	(Kanehisa, 2017)
171	Krebs cycle	1.1.1.42	Iisocitrate dehydrogenase	1 ICIT_P = 1 OAS_P + 1 NADPH_P	(Kanehisa, 2017)
172	Krebs cycle	1.1.1.42	Isocitrate dehydrogenase	1 OAS_P = 1 AKG_P + 1 CO2_P	(Kanehisa, 2017)
173	Krebs cycle	1.2.4.2	2-oxoglutarate dehydrogenase	1 AKG_P + 1 TPP_P > 1 T3hPP_P + 1 CO2_P	(Kanehisa, 2017)
174	Krebs cycle	1.2.4.2	2-oxoglutarate dehydrogenase	1 T3hPP_P + 1 EN6_P > 1 SSE_P + 1 TPP_P	(Kanehisa, 2017)
175	Krebs cycle	2.3.1.61	Dihydrolipoyllysine-residue succinyltransferase	1 SUCCOA_P + 1 EN6d_P = 1 SSE_P	(Kanehisa, 2017)
176	Krebs cycle	6.2.1.5	Succinyl-CoA synthetase (ADP-forming)	1 Pi_P + 1 SUCCOA_P = 1 ATP_P + 1 SUC_P	(Kanehisa, 2017)
177	Krebs cycle	1.3.5.1, 1.3.5.4	Succinate dehydrogenase	1 SUC_P = 1 QH_P + 1 FUM_P	(Kanehisa, 2017)
178	Krebs cycle	4.2.1.2	Fumarate hydratase	1 FUM_P = 1 MAL_P	(Kanehisa, 2017)
179	Krebs cycle	1.1.5.4	Malate dehydrogenase (quinone)	1 MAL_P = 1 QH_P + 1 OA_P	(Kanehisa, 2017)
180	Glioxylate Cycle	4.1.3.1	Isocitrate lyase	1 ICIT_P > 1 GLYOx + 1 SUC_P	(Kanehisa, 2017)
181	Glioxylate Cycle	2.3.3.9	Malate synthase	1 GLYOx + 1 ACCOA_P > 1 MAL_P	(Kanehisa, 2017)
182	Glioxylate Cycle	1.1.1.38	Malate dehydrogenase	1 MAL_P = 1 PYR_P + 1 CO2_P + 1 NADH_P	(Kanehisa, 2017)
183	Pentose Phosphate			1 CO2_P = 1 CO2ext
184	Pentose Phosphate	1.1.1.49	Glucose-6-phosphate-1 dehydrogenase	1 G6P_P > 1 G15L6P_P + 1 NADPH_P + 1 H_P	(Kanehisa, 2017)
185	Pentose Phosphate	3.1.1.31	6-phosphogluconolactonase	1 G15L6P_P > 1 GL6P_P	(Kanehisa, 2017)
186	Pentose Phosphate	1.1.1.44	Phosphogluconate dehydrogenase	1 GL6P_P > 1 CO2_P + 1 NADPH_P + 1 RL5P_P	(Kanehisa, 2017)
187	Pentose Phosphate	5.1.3.1	Ribulose-phosphate 3-epimerase	1 RL5P_P = 1 X5P_P	(Kanehisa, 2017)
188	Pentose Phosphate	5.3.1.6	Ribose-5-phosphate isomerase	1 RL5P_P = 1 R5P_P	(Kanehisa, 2017)
189	Pentose Phosphate	2.2.1.1	Transketolase	1 F6P_P + 1 G3P_P = 1 X5P_P + 1 E4P_P	(Kanehisa, 2017)
190	Pentose Phosphate	2.2.1.2	Transaldolase	1 G3P_P + 1 S7P_P = 1 F6P_P + 1 E4P_P	(Kanehisa, 2017)
191	Pentose Phosphate	2.2.1.1	Transketolase	1 R5P_P + 1 X5P_P = 1 G3P_P + 1 S7P_P	(Kanehisa, 2017)
192	Histidine metabolism	2.7.6.1	Pyrophosphoribosylphosphate synthetase	1 ATP_P + 1 R5P_P = 1 PRPP	(Kanehisa, 2017)
193	Oxidative phosphorylation	1.6.1.1	Transhydrogenase	1 NADPH_P = 1 NADH_P	(Kanehisa, 2017)
194	Oxidative phosphorylation	1.6.5.3	NADH:ubiquinone reductase	1 NADH_P > 1 QH2_P + 2 H_P	(Kanehisa, 2017)
195	Oxidative phosphorylation	1.10.3.10	Ubiquinol oxidase (H+-transporting)	1 QH2_P + 0.5 O2_P > 2 H_P	(Kanehisa, 2017)
196	Oxidative phosphorylation			1 O2ext > 1 O2_P
197	Oxidative phosphorylation			1 Piext > 1 Pi_P
198	Oxidative phosphorylation	3.6.3.14	H+-transporting two-sector ATPase	1 Pi_P + 4 H_P > 1 ATP_P	(Kanehisa, 2017)
199	Acetate Biosynthesis	2.7.2.1	Acetate kinase	1 Pi_P + 1 ACCOA_P = 1 ATP_P + 1 AC	(Kanehisa, 2017)
200	Amino acid biosynthesis: Glutamate			1 NH3ext > 1 NH3_P
201	Amino acid biosynthesis: Glutamate	1.4.1.4	Alanine dehydrogenase	1 NADPH_P + 1 AKG_P + 1 NH3_P > 1 Glu_P	(Kanehisa, 2017)
202	Amino acid biosynthesis: Aspartate	2.6.1.1	Aspartate transaminase	1 OA_P + 1 Glu_P = 1 AKG_P + 1 Asp_P	(Kanehisa, 2017)
203	Amino acid biosynthesis: Asparagine	3.5.1.1	Asparaginase	1 ATP_P + 1 Asp_P + 1 NH3_P > 1 Asn_P	(Kanehisa, 2017)
204	Amino acid biosynthesis: Glutamine	6.3.1.2	Glutamine synthetase	1 ATP_P + 1 Glu_P + 1 NH3_P > 1 Pi_P + 1 Gln_P	(Kanehisa, 2017)
205	Amino acid biosynthesis: Alanine	2.6.1.2	Aminotransferase	1 PYR_P + 1 Glu_P = 1 AKG_P + 1 Ala_P	(Kanehisa, 2017)
206	Amino acid biosynthesis: Proline	1.2.1.41	Glutamate-5-semialdehyde dehydrogenase	1 ATP_P + 2 NADPH_P + 1 Glu_P > 1 Pi_P + 1 Pro_P	(Kanehisa, 2017)
207	Amino acid biosynthesis: Arginine	2.3.1.1	Amino-acid N-acetyltransferase	4 ATP_P + 1 ACCOA_P + 1 CO2_P + 1 NADPH_P + 1 Asp_P + 2 Glu_P + 1 NH3_P > 4 Pi_P + 1 AKG_P + 1 FUM_P + 1 AC + 1 Arg_P	(Kanehisa, 2017)
		2.7.2.8	Acetylglutamate kinase		(Kanehisa, 2017)
		1.2.1.38	N-acetyl-gamma-glutamyl-phosphate reductase		(Kanehisa, 2017)
		2.6.1.11	Acetylornithine transaminase		(Kanehisa, 2017)
		3.5.1.16	Acetylornithine deacetylase		(Kanehisa, 2017)
		6.3.5.5	Carbamoyl-phosphate synthase (glutamine-hydrolysing)		(Kanehisa, 2017)
		2.1.3.3	Ornithine carbamoyltransferase		(Kanehisa, 2017)
		6.3.4.5	Argininosuccinate synthase		(Kanehisa, 2017)
		4.3.2.1	Argininosuccinate lyase		(Kanehisa, 2017)
208	Amino acid biosynthesis: Valine, leucine and isoleucine	2.2.1.6	Acetolactate synthase	2 PYR_P > 1 ACLAC_P + 1 CO2_P	(Kanehisa, 2017)
209	Amino acid biosynthesis: Valine, leucine and isoleucine	1.1.1.86	Ketol-acid reductoisomerase	1 ACLAC_P = 1 OXOB_P	(Kanehisa, 2017)
210	Amino acid biosynthesis: Valine, leucine and isoleucine	2.6.1.42	Branched-chain-amino-acid transaminase	1 Val_P + 1 AKG_P = 1 OXOB_P + 1 Glu_P	(Kanehisa, 2017)
211	Amino acid biosynthesis: Valine, leucine and isoleucine	2.3.3.13	2 isopropylmalate synthase	1 OXOB_P + 1 ACCOA_P > 1 AIM_P	(Kanehisa, 2017)
212	Biosynthesis of branched amino acids	4.2.1.33	3 isopropylmalate dehydratase	1 AIM_P > 1 A3IM_P	(Kanehisa, 2017)
213	Biosynthesis of branched amino acids	1.1.1.85	3 isopropylmalate dehydrogenase	1 A3IM_P > 1 M2OX_P + 1 CO2_P + 1 NADH_P + 1 H_P	(Kanehisa, 2017)
214	Amino acid biosynthesis: Valine, leucine and isoleucine	2.6.1.42	Branched-chain-amino-acid transaminase	1 Leu_P + 1 AKG_P = 1 M2OX_P + 1 Glu_P	(Kanehisa, 2017)
215	Amino acid biosynthesis: Valine, leucine and isoleucine			1 PYR_P + 1 NADPH_P + 1 Glu_P + 1 Thr_P > 1 CO2_P + 1 AKG_P + 1 NH3_P + 1 Iso_P
216	Amino acid biosynthesis: Phenylalanine			1 ATP_P + 2 PEP_P + 1 NADPH_P + 1 E4P_P > 4 Pi_P + 1 CHOR
217	Amino acid biosynthesis: Phenylalanine			1 Glu_P + 1 CHOR > 1 CO2_P + 1 AKG_P + 1 Phe_P
218	Amino acid biosynthesis: Tyrosine			1 Glu_P + 1 CHOR > 1 CO2_P + 1 NADPH_P + 1 AKG_P + 1 Tyr_P
219	Amino acid biosynthesis: Tryptophan	4.1.3.27	Anthranilate synthase	1 Gln_P + 1 CHOR + 1 Ser_P + 1 PRPP > 1 G3P_P + 1 PYR_P + 1 CO2_P + 1 Glu_P + 1 Trp_P	(Kanehisa, 2017)
		2.4.2.18	Anthranilate phosphoribosyltransferase		(Kanehisa, 2017)
		5.3.1.24	Phosphoribosylanthranilate isomerase		(Kanehisa, 2017)
		4.2.1.20	Tryptophan synthase		(Kanehisa, 2017)
220	Amino acid biosynthesis: Histidine	2.5.1.7	UDP-N-acetylglucosamine 1-carboxyvinyltransferase	1 ATP_P + 1 Gln_P + 1 PRPP > 2 NADH_P + 1 AKG_P + 1 His_P	(Kanehisa, 2017)
		3.5.4.19	Phosphoribosyl-AMP cyclohydrolase		(Kanehisa, 2017)
		5.3.1.16	1-(5-phosphoribosyl)-5-[(5-phosphoribosylamino)methylideneamino]imidazole-4-carboxamide isomerase		(Kanehisa, 2017)
		2.4.2.-	Imidazole glycerol phosphate synthase, glutamine amidotransferase subunit with HisF		(Kanehisa, 2017)
		2.4.2.- 4.1.3.-	Glutamine amidotransferase		(Kanehisa, 2017)
		4.2.1.19	Imidazoleglycerol-phosphate dehydratase		(Kanehisa, 2017)
		2.6.1.9	Histidinol-phosphate transaminase		(Kanehisa, 2017)
		1.1.1.23	Histidinol dehydrogenase		(Kanehisa, 2017)
221	Amino acid biosynthesis: Serine	1.1.1.95	Phosphoglycerate dehydrogenase	1 PG3_P + 1 Glu_P > 1 Pi_P + 1 NADH_P + 1 AKG_P + 1 Ser_P	(Kanehisa, 2017)
		2.6.1.52	Phosphoserine transaminase		(Kanehisa, 2017)
		3.1.3.3	Phosphoserine phosphatase		(Kanehisa, 2017)
222	Amino acid biosynthesis: Glycine	1.5.1.20	Methylenetetrahydrofolate reductase [NAD(P)H]	1 ATP_P + 1 NADPH_P = 1 Pi_P + 1 MTHF	(Kanehisa, 2017)
223	Amino acid biosynthesis: Glycine	2.1.2.1	Glycine hydroxymethyltransferase	1 Ser_P = 1 MTHF + 1 Gly_P	(Kanehisa, 2017)
224	Sulphate assimilation			1 SO4ext > 1 SO4_P
225	Sulphate assimilation	2.7.7.4	Sulfate adenylyltransferase	2 ATP_P + 4 NADPH_P + 1 SO4_P > 1 S_P	(Kanehisa, 2017)
		2.7.1.25	Adenylyl-sulfate kinase		(Kanehisa, 2017)
		1.8.4.8	Phosphoadenosine phosphosulfate reductase		(Kanehisa, 2017)
		2.1.1.107	Uroporphyrinogen-III C-methyltransferase		(Kanehisa, 2017)
		1.8.1.2	Sulfite reductase (NADPH)		(Kanehisa, 2017)
226	Amino acid biosynthesis: Cysteine	2.3.1.30	O-acetylserine synthase	1 ACCOA_P + 1 Ser_P + 1 S_P > 1 AC + 1 Cys_P	(Kanehisa, 2017)
		2.5.1.47	Cysteine synthase A		(Kanehisa, 2017)
		2.5.1.47	Cysteine synthase B		(Kanehisa, 2017)
227	Amino acid biosynthesis: Homoserin	2.7.2.4	Aspartate kinase	1 ATP_P + 1 NADPH_P + 1 Asp_P > 1 Pi_P + 1 ASPSALD	(Kanehisa, 2017)
		1.2.1.11	Aspartate-semialdehyde dehydrogenase		(Kanehisa, 2017)
228	Amino acid biosynthesis: Homoserin	1.1.1.3	Homoserine dehydrogenase	1 NADPH_P + 1 ASPSALD > 1 Hser_P	(Kanehisa, 2017)
229	Amino acid biosynthesis: Threonine	2.7.1.39	Homoserine kinase	1 ATP_P + 1 Hser_P > 1 Thr_P	(Kanehisa, 2017)
		4.2.3.1	Threonine synthase		(Kanehisa, 2017)
230	Amino acid biosynthesis: Methionine	4.3.3.7	4-hydroxy-tetrahydrodipicolinate synthase	1 PYR_P + 1 NADPH_P + 1 SUCCOA_P + 1 Glu_P + 1 ASPSALD > 1 AKG_P + 1 SUC_P + 1 DIAMPIM	(Kanehisa, 2017)
		1.17.1.8	4-hydroxy-tetrahydrodipicolinate reductase		(Kanehisa, 2017)
		2.6.1.17	Succinyldiaminopimelate transaminase		(Kanehisa, 2017)
		2.3.1.117	2,3,4,5-tetrahydropyridine-2,6-dicarboxylate N-succinyltransferase		(Kanehisa, 2017)
		3.5.1.18	Succinyl-diaminopimelate desuccinylase		(Kanehisa, 2017)
		5.1.1.7	Diaminopimelate epimerase		(Kanehisa, 2017)
231	Amino acid biosynthesis: Methionine	2.3.1.46	homoserine O-succinyltransferase	1 SUCCOA_P + 1 MTHF + 1 Cys_P + 1 Hser_P > 1 PYR_P + 1 SUC_P + 1 NH3_P + 1 Met_P	(Kanehisa, 2017)
		4.4.1.11	Methionine-gamma-lyase		(Kanehisa, 2017)
		4.4.1.1	Cystathionine gamma-lyase		(Kanehisa, 2017)
		2.1.1.14	5-methyltetrahydropteroyltriglutamate--homocysteine methyltransferase		(Kanehisa, 2017)
		2.1.1.13	methionine synthase		(Kanehisa, 2017)
232	Amino acid biosynthesis: Lysine	4.1.1.20	Diaminopimelate decarboxylase	1 DIAMPIM > 1 CO2_P + 1 Lys_P	(Kanehisa, 2017)
233	Synthesis of ribonucleic acids	2.4.2.14	Amidophosphoribosyltransferase	5 ATP_P + 1 CO2_P + 1 Asp_P + 2 Gln_P + 1 PRPP + 2 MTHF + 1 Gly_P > 5 Pi_P + 1 NADPH_P + 2 FUM_P + 2 Glu_P + 1 RATP	(Kanehisa, 2017)
		6.3.4.13	Phosphoribosylamine---glycine ligase		(Kanehisa, 2017)
		2.1.2.2	Phosphoribosylglycinamide formyltransferase		(Kanehisa, 2017)
		6.3.3.1	Phosphoribosylformylglycinamidine cyclo-ligase		(Kanehisa, 2017)
		6.3.5.3	Phosphoribosylformylglycinamidine synthase		(Kanehisa, 2017)
		4.1.1.21	5-(carboxyamino)imidazole ribonucleotide synthase		(Kanehisa, 2017)
		4.1.1.21	Phosphoribosylaminoimidazole carboxylase		(Kanehisa, 2017)
		6.3.4.4	Adenylosuccinate synthase		(Kanehisa, 2017)
		4.3.2.2	Adenylosuccinate lyase		(Kanehisa, 2017)
		2.1.2.3	Phosphoribosylaminoimidazolecarboxamide formyltransferase / IMP cyclohydrolase		(Kanehisa, 2017)
		6.3.2.6	Phosphoribosylaminoimidazolesuccinocarboxamide synthase		(Kanehisa, 2017)
		2.7.4.3	Adenylate kinase		(Kanehisa, 2017)
234	Synthesis of ribonucleic acids	6.3.5.2	GMP synthase (glutamine-hydrolysing)	6 ATP_P + 1 CO2_P + 1 Asp_P + 3 Gln_P + 1 PRPP + 2 MTHF + 1 Gly_P > 6 Pi_P + 1 NADH_P + 1 NADPH_P + 2 FUM_P + 3 Glu_P + 1 RGTP	(Kanehisa, 2017)
		1.1.1.205	IMP dehydrogenase		(Kanehisa, 2017)
		2.7.4.8	Guanylate kinase		(Kanehisa, 2017)
235	Synthesis of ribonucleic acids	2.1.3.2	Aspartate carbamoyltransferase	4 ATP_P + 1 Asp_P + 1 NH3_P + 1 PRPP > 1 NADH_P + 1 RUTP	(Kanehisa, 2017)
		3.5.2.3	Dihydroorotase		(Kanehisa, 2017)
		1.3.98.1	Dihydroorotate dehydrogenase		(Kanehisa, 2017)
		2.4.2.10	Orotate phosphoribosyltransferase		(Kanehisa, 2017)
		4.1.1.23	Orotidine-5'-phosphate decarboxylase		(Kanehisa, 2017)
		2.7.4.22	Uridylate kinase		(Kanehisa, 2017)
		2.7.4.6	Nucleoside-diphosphate kinase		(Kanehisa, 2017)
236	Synthesis of ribonucleic acids	6.3.4.2	Uridine triphosphate aminase	1 ATP_P + 1 Gln_P + 1 RUTP > 1 Pi_P + 1 Glu_P + 1 RCTP	(Kanehisa, 2017)
		2.7.4.14	Cytidylate kinase		(Kanehisa, 2017)
237	Synthesis of deoxyribonucleic acids	1.17.4.1	Ribonucleoside-diphosphate reductase beta chain	1 NADPH_P + 1 RATP > 1 dATP	(Kanehisa, 2017)
		2.7.4.6	Nucleoside-diphosphate kinase		(Kanehisa, 2017)
238	Synthesis of deoxyribonucleic acids	1.17.4.1	Ribonucleoside-diphosphate reductase beta chain	1 NADPH_P + 1 RGTP > 1 dGTP	(Kanehisa, 2017)
		2.7.4.6	Nucleoside-diphosphate kinase		(Kanehisa, 2017)
239	Synthesis of deoxyribonucleic acids	1.17.4.1	Ribonucleoside-diphosphate reductase beta chain	1 NADPH_P + 1 RCTP > 1 dCTP	(Kanehisa, 2017)
		2.7.4.6	Nucleoside-diphosphate kinase		(Kanehisa, 2017)
240	Synthesis of deoxyribonucleic acids	1.17.4.1	Ribonucleoside-diphosphate reductase beta chain	2 NADPH_P + 1 MTHF + 1 RUTP > 1 dTTP	(Kanehisa, 2017)
		2.7.4.6	Nucleoside-diphosphate kinase		(Kanehisa, 2017)
241	Synthesis of MITFS	2.3.1.41	beta-ketoacyl-[acyl-carrier-protein] synthase I	7.24 ATP_P + 8.2 ACCOA_P + 13.91 NADPH_P > 7.24 Pi_P + 1 MITFS	(Kanehisa, 2017)
242	Synthesis of lipopolysaccharides	5.4.2.8	Phosphomannomutase	1 ATP_P + 1 G6P_P > 1 Pi_P + 1 UDPGLC	(Kanehisa, 2017)
		2.7.7.9	UTP---glucose-1-phosphate uridylyltransferase		(Kanehisa, 2017)
243	Synthesis of lipopolysaccharides		Ethanolamide phosphotransferase	3 ATP_P + 1 PG3_P + 1 NADPH_P + 1 NH3_P > 3 Pi_P + 1 NADH_P + 1 CDPETH
244	Synthesis of lipopolysaccharides	2.3.1.41	beta-ketoacyl-[acyl-carrier-protein] synthase I	6 ATP_P + 7 ACCOA_P + 11 NADPH_P > 6 Pi_P + 1 OHMYRAC	(Kanehisa, 2017)
245	Synthesis of lipopolysaccharides	2.3.1.41	beta-ketoacyl-[acyl-carrier-protein] synthase I	6 ATP_P + 7 ACCOA_P + 12 NADPH_P > 6 Pi_P + 1 C14OFS	(Kanehisa, 2017)
246	Synthesis of lipopolysaccharides	2.7.7.38	3-deoxy-manno-octulosonate cytidylyltransferase	2 ATP_P + 1 PEP_P + 1 R5P_P > 2 Pi_P + 1 CMPKDO	(Kanehisa, 2017)
247	Synthesis of lipopolysaccharides			1 ATP_P + 1.5 G6P_P > 1 Pi_P + 4 NADPH_P + 1 NDPHEP
248	Synthesis of lipopolysaccharides			2 ATP_P + 1 F6P_P + 1 NH3_P > 2 Pi_P + 1 TDPGLCS
249	Synthesis of peptidoglycans	2.6.1.16	Glutamine---fructose-6-phosphate transaminase (isomerizing)	1 ATP_P + 1 F6P_P + 1 ACCOA_P + 1 Gln_P > 1 Glu_P + 1 UDPNAG_P	(Kanehisa, 2017)
250	Synthesis of peptidoglycans	2.5.1.55	2-dehydro-3-deoxyphosphooctonate aldolase	1 PEP_P + 1 NADPH_P + 1 UDPNAG_P > 1 UDPNAM_P	(Kanehisa, 2017)
251	Synthesis of peptidoglycans	2.4.1.21	glycogen synthase	1 ATP_P + 1 G6P_P > 1 Pi_P + 1 ADPGLC_P	(Kanehisa, 2017)
252	Synthesis of polyhydroxyalkanoates	6.4.1.2	Acetyl-CoA carboxylase	1 ATP_P + 1 ACCOA_P + 1 CO2_P > 1 Pi_P + 1 MALCOA	(Kanehisa, 2017)
253	Synthesis of polyhydroxyalkanoates	2.3.1.39	[Acyl carrier protein]malonyltransferase	1 MALCOA = 1 MALACP	(Kanehisa, 2017)
254	Synthesis of polyhydroxyalkanoates	2.3.1.38	[Acyl-carrier-protein] S-acetyltransferase	1 ACCOA_P = 1 ACACP	(Kanehisa, 2017)
255	Synthesis of polyhydroxyalkanoates	2.3.1.41	Beta-ketoacyl-[acyl-carrier-protein] synthase I	1 MALACP + 1 ACACP > 1 ACACCOAACP	(Kanehisa, 2017)
256	Synthesis of polyhydroxyalkanoates	1.1.1.100	Beta-ketoacyl-[acyl-carrier protein](ACP) reductase	1 NADPH_P + 1 ACACCOAACP > 1 D3HBACP	(Kanehisa, 2017)
257	Synthesis of polyhydroxyalkanoates	4.2.1.59	3-hydroxyacyl-[acyl-carrier-protein] dehydratase	1 NADPH_P + 1 D3HBACP > 1 BACP	(Kanehisa, 2017)
258	Synthesis of polyhydroxyalkanoates	1.3.1.9	Enoyl-[acyl carrier protein] reductase	1 NADPH_P + 1 MALACP + 1 BACP > 1 CO2_P + 1 D3HHXACP	(Kanehisa, 2017)
259	Synthesis of polyhydroxyalkanoates			1 NADPH_P + 1 D3HHXACP > 1 HHXACP
260	Synthesis of polyhydroxyalkanoates			1 NADPH_P + 1 MALACP + 1 HHXACP > 1 CO2_P + 1 D3HOACP
261	Synthesis of polyhydroxyalkanoates			1 NADPH_P + 1 D3HOACP > 1 OACP
262	Synthesis of polyhydroxyalkanoates			1 NADPH_P + 1 MALACP + 1 OACP > 1 CO2_P + 1 D3HDACP
263	Synthesis of polyhydroxyalkanoates			1 NADPH_P + 1 D3HDACP > 1 DACP
264	Synthesis of polyhydroxyalkanoates			1 NADPH_P + 1 MALACP + 1 DACP > 1 CO2_P + 1 D3HDODACP
265	Synthesis of polyhydroxyalkanoates			1 D3HOACP > 1 D3HOCOA
266	Synthesis of polyhydroxyalkanoates	2.3.1.-	poly(3-hydroxyalkanoic acid) synthase	1 D3HOCOA > 1 PHO	(Kanehisa, 2017)
267	Synthesis of polyhydroxyalkanoates			1 D3HDACP > 1 D3HDCOA
268	Synthesis of polyhydroxyalkanoates	2.3.1.-	poly(3-hydroxyalkanoic acid) synthase	1 D3HDCOA > 1 PHD	(Kanehisa, 2017)
269	Synthesis of polyhydroxyalkanoates			1D3HDODACP > 1 D3HDODCOA
270	Synthesis of polyhydroxyalkanoates	2.3.1.-	poly(3-hydroxyalkanoic acid) synthase	1 D3HDODCOA > 1 PHDOD	(Kanehisa, 2017)
271	Synthesis of polyhydroxyalkanoates	2.3.1.-	poly(3-hydroxyalkanoic acid) synthase	1 PHO + 1 PHD + 1 PHDOD > 1 PHAs	(Kanehisa, 2017)
272	Synthesis of polyhydroxyalkanoates			1 PHAs > 1 PHAsext
273	Biomass synthesis (P. aeruginosa)			23.9827 ATP_P + 0.14176 G3P_P + 0.24149 Asp_P + 0.29124 Glu_P + 0.24149 Asn_P + 0.26364 Gln_P + 0.56982 Ala_P + 0.22146 Pro_P + 0.29633 Arg_P + 0.45134 Leu_P + 0.42393 Val_P + 0.29106 Iso_P + 0.25414 Thr_P + 0.1856 Phe_P + 0.13814 Tyr_P + 0.056944 Trp_P + 0.35794 Ser_P + 0.094911 His_P + 0.61376 Gly_P + 0.091744 Cys_P + 0.0276 DIAMPIM + 0.34378 Lys_P + 0.15397 Met_P + 0.203 RGTP + 0.136 RUTP + 0.…
274	Exchange Flows			> 1 Pho
275	Exchange Flows			> 1 Piext
276	Exchange Flows			> 1 K
277	Exchange Flows			> 1 Mg
278	Exchange Flows			> 1 PO4ext
279	Exchange Flows			> 1 SO4ext
280	Exchange Flows			> 1 Fe
281	Exchange Flows			> 1 Ca
282	Exchange Flows			> 1 Zn
283	Exchange Flows			> 1 Cu
284	Exchange Flows			> 1 Mn
285	Exchange Flows			> 1 BIO_Cv
286	Exchange Flows			> 1 GLCext
287	Exchange Flows			> 1 NO3ext
288	Exchange Flows			> 1 BIO_P
289	Exchange Flows			> 1 PHAsext
290	Exchange Flows			> 1 NH3ext
291	Exchange Flows			> 1 CO2ext
292	Exchange Flows			> 1 O2ext
293	Exchange Flows			> 1 MALText
Allen J (2002) Photosynthesis of ATP-electrons, proton pumps, rotors, and poise. Cell 110:273–6. doi: 10.1016/S0092-8674(02)00870-X
Kanehisa L (2016) KEGG: Kyoto Encyclopedia of Genes and Genomes. http://www.genome.jp/kegg/. Accessed 13 Jan 2016
Nelson DL, Cox MM (2005) Lehninger Principles of Biochemistry, 4th edn. Freeman and Company, New York, USA
Oberhardt M a, Puchałka J, Fryer KE, et al (2008) Genome-scale metabolic network analysis of the opportunistic pathogen Pseudomonas aeruginosa PAO1. J Bacteriol 190:2790–2803. doi: 10.1128/JB.01583-07
Petkov G, Garcia G (2007) Which are fatty acids of the green alga Chlorella? Biochem Syst Ecol 35:281–285. doi: 10.1016/j.bse.2006.10.017
Stephanopoulos GN, Aristidou AA, Nielsen J (1998) Metabolic Engineering: Principles and Methodologies. Academic Press, California, USA.
Yang C, Hua Q, Shimizu K (2000) Energetics and carbon metabolism during growth of microalgal cells under photoautotrophic, mixotrophic and cyclic light-autotrophic/dark-heterotrophic conditions. Biochem Eng J 6:87–102. doi: 10.1016/S1369-703X(00)00080-2
