# Supplementary material for: Metabolic Pathway Analysis for Nutrient Removal of the Consortium between <em>C. vulgaris</em> and <em>P. aeruginosa</em>
Source: Preprints.org preprint supplement (doi:10.20944/preprints201903.0002.v1), 2019-03-01
Supplement: Supplementary file 3 [file Appendix B.xlsx]

## Sheet: CODE COMPOUNDS
APPENDIX B.- NOMENCLATURE OF COMPOUNDS
CODE	KEGG CODE	NAME
A3IM_P	C04411	(2R,3S)-3-Isopropylmalate in P. aeruginosa
AC	C00033	Acetate in P. aeruginosa
AC_Cv	C00033	Acetate in C. vulgaris
ACACCOAACP	C05744	Acetoacetyl-[acyl-carrier protein]
ACACP	C03939	Acetyl-[acyl-carrier protein]
ACCOA_Cv	C00024	Acetyl coenzyme A in C. vulgaris
ACCOA_P	C00024	Acetyl coenzyme A in P. aeruginosa
ACLAC_P	C06010	(S)-2-Acetolactate in P. aeruginosa
ACO_Cv	C00417	cis-Aconitate in C. vulgaris
ACT_Cv	C00084	Acetaldehyde in C. vulgaris
AcylCoA	C00024	Acetyl coenzyme A
ADPGLC_P	C00498	Adenosine diphosphoglucose in P. aeruginosa
AIM_P	C02504	alpha-Isopropylmalate in P. aeruginosa
AKG_Cv	C00026	2-Oxoglutarate in C. vulgaris
AKG_P	C00026	2-Oxoglutarate in P. aeruginosa
Ala_Cv	C00041	L-Alanine in C. vulgaris
Ala_P	C00041	L-Alanine in P. aeruginosa
ALMI_c	C00369	Starch in chloroplast
AMP_Cv	C00020	Adenosine 5'-monophosphate in C. vulgaris
Arg_Cv	C00062	L-Arginine in C. vulgaris
Arg_P	C00062	L-Arginine in P. aeruginosa
ARO_Cv	C00826	L-Arogenate in C. vulgaris
Aser_Cv	C00979	O-Acetyl-L-serine in C. vulgaris
Asn_P	C00152	L-Asparagine in P. aeruginosa
Asp_Cv	C00049	L-Aspartate in C. vulgaris
Asp_P	C00049	L-Aspartate in P. aeruginosa
ASPSALD	C00441	L-Aspartate 4-semialdehyde in P. aeruginosa
ASPSALD_Cv	C00441	L-Aspartate 4-semialdehyde in C. vulgaris
ATP_Cv	C00002	Adenosine 5'-triphosphate in C.vulgaris
ATP_P	C00002	Adenosine 5'-triphosphate in P. aeruginosa
BACP	C05745	Butyryl-[acyl-carrier protein]
BIO_Cv		Biomass of Chlorella vulgaris
BIO_P		Biomass of Pseudomonas aeruginosa
C14:0CoA	C02593	Tetradecanoyl-CoA
C14OFS	C06424	Tetradecanoic acid
C16:0CoA	C00154	Palmitoyl-CoA
C16:1CoA	C08362	Palmitoleic acid
C16:2CoA	C05272	trans-2-Hexadecenoyl-CoA
C16:3CoA	C05258	(S)-3-Hydroxyhexadecanoyl-CoA
C18:0CoA	C00412	Stearoyl-CoA
C18:1CoA	C00712	(9Z)-Octadecenoic acid
C18:2CoA	C02050	Linoleoyl-CoA
C18:3CoA	C16162	alpha-Linolenoyl-CoA
Ca	C00076	Calcium cation
CARBH		Total carbohydrates
CD5P_Cv	C01302	1-(2-Carboxyphenylamino)-1-deoxy-D-ribulose 5-phosphate
CDPETH	C00570	Cytidine diphosphate ethanolamine
CHL	C01793	Chlorophyll
Chla	C05306	Chlorophyll a
Chlb	C05307	Chlorophyll b
CHOR	C00251	Chorismate in P. aeruginosa
CHOR_Cv	C00251	Chorismate in C. vulgaris
CIT_Cv	C00158	Citrate in C. vulgaris
CIT_P	C00158	Citrate in P. aeruginosa
CMP_Cv	C00055	Cytidine-5'-monophosphate in C. vulgaris
CMPKDO	N/A	Cisteína monofosfato 2-alfa-desoxioctanoato
CO2_Cv	C00011	Carbon dioxide in C. vulgaris
CO2_P	C00011	Carbon dioxide in P. aeruginosa
CO2ext	C00011	External carbon dioxide
Cu	C00070	Copper
Cys_Cv	C00097	L-Cysteine in C. vulgaris
Cys_P	C00097	L-Cysteine in P. aeruginosa
D3HBACP	C04618	(3R)-3-Hydroxybutanoyl-[acyl-carrier protein]
D3HDACP	C16220	(R)-3-Hydroxyoctadecanoyl-[acp]
D3HDCOA	C05264	(S)-Hydroxydecanoyl-CoA
D3HDODACP	C05757	(R)-3-Hydroxydodecanoyl-[acp]
D3HDODCOA	C05262	(S)-3-Hydroxydodecanoyl-CoA
D3HHXACP	C05747	(R)-3-Hydroxyhexanoyl-[acp]
D3HOACP	C04620	(3R)-3-Hydroxyoctanoyl-[acyl-carrier protein]
D3HOCOA	C05266	(S)-3-Hydroxyoctanoyl-CoA
DACP	C05755	Decanoyl-[acyl-carrier protein]
DAHP_Cv	C04691	2-Dehydro-3-deoxy-D-arabino-heptonate 7-phosphate in C. vulgaris
dAMP_Cv	C00360	2'-Deoxyadenosine 5'-phosphate in C. vulgaris
DAP_c	C00111	Glycerone phosphate in chloroplast
DAP_Cv	C00111	Glycerone phosphate in C. vulgaris
DAP_P	C00111	Glycerone phosphate in P. aeruginosa
dATP	C00131	2'-Deoxyadenosine 5'-triphosphate
dCMP_Cv	C00239	Deoxycytidylic acid in C. vulgaris
dCTP	C00458	Deoxycytidine 5'-triphosphate
dGMP_Cv	C00362	2'-Deoxyguanosine 5'-monophosphate in C. vulgaris
dGTP	C00286	2'-Deoxyguanosine 5'-triphosphate
DHQ_Cv	C00944	3-Dehydroquinate in C. vulgaris
DHSK_Cv	C02637	3-Dehydroshikimate in C. vulgaris
DIAMPIM	C00666	LL-2,6-Diaminoheptanedioate
DIAMPIM_Cv	C00666	LL-2,6-Diaminoheptanedioate in C. vulgaris
DNA_Cv	C00039	Deoxyribonucleic acid of C. vulgaris
dTMP_Cv	C00364	Thymidine 5'-phosphate in C. vulgaris
dTTP	C11437	1-Deoxy-D-xylulose 5-phosphate
E4P_c	C00279	D-Erythrose 4-phosphate in chloroplast
E4P_Cv	C00279	D-Erythrose 4-phosphate in C. vulgaris
E4P_P	C00279	D-Erythrose 4-phosphate in P. aeruginosa
EN6_Cv	C15972	Enzyme N6-(lipoyl)lysine in C. vulgaris
EN6_P	C15972	Enzyme N6-(lipoyl)lysine in P. aeruginosa
EN6d_Cv	C15973	Enzyme N6-(dihydrolipoyl)lysine in C. vulgaris
EN6d_P	C15973	Enzyme N6-(dihydrolipoyl)lysine in P. aeruginosa
EN6s	C15972	Lipoamide-E
F6P_c	C05345	beta-D-Fructose 6-phosphate in chloroplast
F6P_Cv	C05345	beta-D-Fructose 6-phosphate in C. vulgaris
F6P_P	C05345	beta-D-Fructose 6-phosphate in P. aeruginosa
FDP_c	C05378	beta-D-Fructose 1,6-bisphosphate in chloroplast
FDP_Cv	C05378	beta-D-Fructose 1,6-bisphosphate in C. vulgaris
FDP_P	C05378	beta-D-Fructose 1,6-bisphosphate in P. aeruginosa
Fe	C00023	Iron
FUM_Cv	C00122	Fumarate in C. vulgaris
FUM_P	C00122	Fumarate in P. aeruginosa
G15L6P_Cv	C01236	D-Glucono-1,5-lactone 6-phosphate in C. vulgaris
G15L6P_P	C01236	D-Glucono-1,5-lactone 6-phosphate in P. aeruginosa
G3P_c	C00118	D-Glyceraldehyde 3-phosphate in chloroplast
G3P_Cv	C00118	D-Glyceraldehyde 3-phosphate in C. vulgaris
G3P_P	C00118	D-Glyceraldehyde 3-phosphate in P. aeruginosa
G6P_c	C00668	alpha-D-Glucose 6-phosphate in chloroplast
G6P_Cv	C00668	alpha-D-Glucose 6-phosphate in C. vulgaris
G6P_P	C00668	alpha-D-Glucose 6-phosphate in P. aeruginosa
GL6P_Cv	C00345	6-Phospho-D-gluconate in C. vulgaris
GL6P_P	C00345	6-Phospho-D-gluconate in P. aeruginosa
GLC_Cv	C00267	alpha-D-Glucose in C. vulgaris
GLC_P	C00267	alpha-D-Glucose in P. aeruginosa
GLCext	C00267	External alpha-D-Glucose
Gln_Cv	C00064	L-Glutamine in C. vulgaris
Gln_P	C00064	L-Glutamine in P. aeruginosa
Glu_Cv	C00025	L-Glutamate in C. vulgaris
Glu_P	C00025	L-Glutamate in P. aeruginosa
Gly_Cv	C00037	Glycine in C. vulgaris
Gly_P	C00037	Glycine in P. aeruginosa
GLYOx	C00048	Glyoxylate
GMP_Cv	C00144	Guanosine 5'-phosphate in C. vulgaris
H_Cv	C00080	Hydron in C. vulgaris
H_m	C00080	Hydron in mitochondria
H_P	C00080	Hydron in P. aeruginosa
HCO3_Cv	C00288	Bicarbonate in C. vulgaris
HHXACP	C05749	Hexanoyl-[acyl-carrier protein]
His_Cv	C00135	L-Histidine in C. vulgaris
His_P	C00135	L-Histidine in P. aeruginosa
Hser_Cv	C00263	L-Homoserine in C. vulgaris
Hser_P	C00263	L-Homoserine in P. aeruginosa
HTHP_Cv	C03972	2,3,4,5-Tetrahydrodipicolinate in C. vulgaris
I3GP_Cv	C03506	Indoleglycerol phosphate in C. vulgaris
ICIT_Cv	C00311	Isocitrate in C. vulgaris
ICIT_P	C00311	Isocitrate in P. aeruginosa
Iso_Cv	C00123	L-Leucine in C. vulgaris
Iso_P	C00123	L-Leucine in P. aeruginosa
K	C00238	Potassium cation
Leu_Cv	C16439	Leucine in C. vulgaris
Leu_P	C16439	Leucine in P. aeruginosa
LIPID		Lípidos totales
Lys_Cv	C00047	L-Lysine in C. vulgaris
Lys_P	C00047	L-Lysine in P. aeruginosa
M2OX_P	C00233	4-Methyl-2-oxopentanoate in P. aeruginosa
MAL_Cv	C00149	(S)-Malate in C. vulgaris
MAL_P	C00149	(S)-Malate in P. aeruginosa
MALACP	C01209	Malonyl-[acyl-carrier protein]
MALCOA	C00083	Malonyl coenzyme A
MALT_Cv	C00208	Maltose in C. vulgaris
MALT_P	C00208	Maltose in P. aeruginosa
MALText	C00208	External maltose
MDIAMPIM_Cv	C00680	meso-2,6-Diaminoheptanedioate
Met_Cv	C00073	L-Methionine in C. vulgaris
Met_P	C00073	L-Methionine in P. aeruginosa
Mg	C00305	Magnesium cation
MITFS		Fatty acids comprised between 16 and 18 carbon atoms
Mn	C00034	Manganese
MTHF	C00143	5,10-Methylenetetrahydrofolate
NADH_Cv	C00004	Reduced nicotinamide adenine dinucleotide in C. vulgaris
NADH_P	C00004	Reduced nicotinamide adenine dinucleotide in P. aeruginosa
NADPH_Cv	C00005	Reduced nicotinamide adenine dinucleotide phosphate in C. vulgaris
NADPH_P	C00005	Reduced nicotinamide adenine dinucleotide phosphate in P. aeruginosa
NDPHEP		Mannoheptose diphosphate nucleotide
NH3_Cv	C00014	Ammonia in C. vulgaris
NH3_P	C00014	Ammonia in P. aeruginosa
NH3ext	C00014	External ammonia
NO3ext	C00244	External nitrate
O2_Cv	C00007	Oxygen in C. vulgaris
O2_P	C00007	Oxygen in P. aeruginosa
O2ext	C00007	External oxygen
OA_Cv	C00036	Oxaloacetate in C. vulgaris
OA_P	C00036	Oxaloacetate in P. aeruginosa
OACP	C05752	Octanoyl-[acyl-carrier protein]
OAS_P	C05379	Oxalosuccinate in P. aeruginosa
OHMYRAC	C04688	(3R)-3-Hydroxytetradecanoyl-[acyl-carrier protein]
OXOB_P	C00141	3-Methyl-2-oxobutanoic acid in P. aeruginosa
Pasp_Cv	C03082	4-Phospho-L-aspartate in C. vulgaris
PC_Cv	C00157	Phosphatidylcholine in C. vulgaris
PE_Cv	C00350	Phosphatidylethanolamine in C. vulgaris
PEP_Cv	C00074	Phosphoenolpyruvate in C. vulgaris
PEP_P	C00074	Phosphoenolpyruvate in P. aeruginosa
PG_Cv	C00344	Phosphatidylglycerol in C. vulgaris
PG13_c	C00236	3-Phospho-D-glyceroyl phosphate in chloroplast
PG13_Cv	C00236	3-Phospho-D-glyceroyl phosphate in C. vulgaris
PG13_P	C00236	3-Phospho-D-glyceroyl phosphate in P. aeruginosa
PG2_Cv	C00631	2-Phospho-D-glycerate in C. vulgaris
PG2_P	C00631	2-Phospho-D-glycerate in P. aeruginosa
PG3_c	C00197	3-Phospho-D-glycerate in chloroplast
PG3_Cv	C00197	3-Phospho-D-glycerate in C. vulgaris
PG3_P	C00197	3-Phospho-D-glycerate in P. aeruginosa
PHAs		Poly (3-hydroxyalkanoates)
PHAsext		External poly (3-hydroxyalkanoates)
PHD		Poly (3-hydroxydecanoate)
PHDOD		Poly (3-hydroxydecanoate)
Phe_Cv	C00079	L-Phenylalanine in C. vulgaris
Phe_P	C00079	L-Phenylalanine in P. aeruginosa
Pho		Photon
PHO		Poly (3-hydroxyoctanoate)
PHser_Cv	C01102	O-Phospho-L-homoserine in C. vulgaris
Pi_Cv	C06262	Phosphorus in C. vulgaris
Pi_P	C06262	Phosphorus in P. aeruginosa
Piext	C06262	External phosphorus
PO4_Cv	C00009	Phosphate in C. vulgaris
PO4ext	C00009	External phosphate
PP3_Cv	C03232	3-Phosphonooxypyruvate in C. vulgaris
PRE_Cv	C00254	Prephenate in C. vulgaris
PRO_Cv		Total protein in C. vulgaris
Pro_P	C00148	L-Proline in P. aeruginosa
Prol_Cv	C00148	L-Proline in C. vulgaris
PRPP	C00119	5-Phospho-alpha-D-ribose 1-diphosphate
PRPP_Cv	C00119	5-Phospho-alpha-D-ribose 1-diphosphate in C. vulgaris
Pser_Cv	C01005	O-Phospho-L-serine in C. vulgaris
PYR_Cv	C00022	Pyruvate in C. vulgaris
PYR_P	C00022	Pyruvate in P. aeruginosa
QH_P	C15603	Hydroquinone in P. aeruginosa
QH2_P	C00390	Ubiquinol in P. aeruginosa
R5P_c	C00117	D-Ribose 5-phosphate in chloroplast
R5P_Cv	C00117	D-Ribose 5-phosphate in C. vulgaris
R5P_P	C00117	D-Ribose 5-phosphate in P. aeruginosa
RATP		Adenosine triphosphate ribonucleotide
RCTP		Cytosine triphosphate ribonucleotide
RGTP		Guanine triphosphate ribonucleotide
RL5P_c	C00199	D-Ribulose 5-phosphate in chloroplast
RL5P_Cv	C00199	D-Ribulose 5-phosphate in C. vulgaris
RL5P_P	C00199	D-Ribulose 5-phosphate in P. aeruginosa
RNA_Cv	C00046	Ribonucleic acid of C. vulgaris
RuBP_c	C01182	D-Ribulose 1,5-bisphosphate in chloroplast
RUTP		Uridine triphosphate ribonucleotide
S_P	C00087	Sulfur in P. aeruginosa
S17P_c	C00447	Sedoheptulose 1,7-bisphosphate in chloroplast
S7P_c	C05382	Sedoheptulose 7-phosphate in chloroplast
S7P_Cv	C05382	Sedoheptulose 7-phosphate in C. vulgaris
S7P_P	C05382	Sedoheptulose 7-phosphate in P. aeruginosa
Ser_Cv	C00065	L-Serine in C. vulgaris
Ser_P	C00065	L-Serine in P. aeruginosa
Shi_Cv	C00493	Shikimate in C. vulgaris
Shi35P_Cv	C01269	5-O-(1-Carboxyvinyl)-3-phosphoshikimate in C. vulgaris
Shi3P_Cv	C03175	Shikimate 3-phosphate in C. vulgaris
sHTHP_Cv	C20258	(2S,4S)-4-Hydroxy-2,3,4,5-tetrahydrodipicolinate in C. vulgaris
SO4_Cv	C00059	Sulfate in C. vulgaris
SO4_P	C00059	Sulfate in P. aeruginosa
SO4ext	C00059	External sulfate
SSE_Cv	C16255	[Dihydrolipoyllysine-residue acetyltransferase] S-acetyldihydrolipoyllysine in C. vulgaris
SSE_P	C16255	[Dihydrolipoyllysine-residue acetyltransferase] S-acetyldihydrolipoyllysine in P. aeruginosa
SUC_Cv	C00042	Succinate in C. vulgaris
SUC_P	C00042	Succinate in P. aeruginosa
SUCCOA_Cv	C00091	Succinyl-CoA in C. vulgaris
SUCCOA_P	C00091	Succinyl-CoA in P. aeruginosa
T_P	C01083	Trehalose in P. aeruginosa
T2hPP_Cv	C05125	2-(alpha-Hydroxyethyl)thiamine diphosphate in C. vulgaris
T2hPP_P	C05125	2-(alpha-Hydroxyethyl)thiamine diphosphate in P. aeruginosa
T3hPP_Cv	C05381	3-Carboxy-1-hydroxypropyl-ThPP in C. vulgaris
T3hPP_P	C05381	3-Carboxy-1-hydroxypropyl-ThPP in P. aeruginosa
TAG_Cv	C00422	Triacylglycerol in C. vulgaris
TDPGLCS		Thymidine-5-diphosphate glucosamine
Thr_Cv	C00188	L-Threonine in C. vulgaris
Thr_P	C00188	L-Threonine in P. aeruginosa
TPP_Cv	C00068	Thiamin diphosphate in C. vulgaris
TPP_P	C00068	Thiamin diphosphate in P. aeruginosa
Trp_Cv	C00525	D-Tryptophan in C. vulgaris
Trp_P	C00525	D-Tryptophan in P. aeruginosa
Tyr_Cv	C00082	L-Tyrosine in C. vulgaris
Tyr_P	C00082	L-Tyrosine in P. aeruginosa
UDPGAL_Cv	C00052	UDP-alpha-D-galactose in C. vulgaris
UDPGLC	C00029	UDP-glucose
UDPGLC_Cv	C00029	UDP-glucose in C. vulgaris
UDPNAG_Cv	C02200	UDP-glucosamine in C. vulgaris
UDPNAG_P	C02200	UDP-glucosamine in P. aeruginosa
UDPNAM_P	C01050	UDP-N-acetylmuramate in P. aeruginosa
UMP_Cv	C00105	Uridine monophosphate in C. vulgaris
Val_Cv	C00183	L-Valine in C. vulgaris
Val_P	C00183	L-Valine in P. aeruginosa
VL1_Cv	C00108	Anthranilate in C. vulgaris
VL15P_Cv	C04302	N-(5-Phospho-D-ribosyl)anthranilate in C. vulgaris
X5P_c	C00231	D-Xylulose 5-phosphate in chloroplast
X5P_Cv	C00231	D-Xylulose 5-phosphate in C. vulgaris
X5P_P	C00231	D-Xylulose 5-phosphate in P. aeruginosa
Zn	C00038	Zinc
