# Supplementary material for: Metabolic Pathway Analysis for Nutrient Removal of the Consortium between <em>C. vulgaris</em> and <em>P. aeruginosa</em>
Source: Preprints.org preprint supplement (doi:10.20944/preprints201903.0002.v1), 2019-03-01
Supplement: Supplementary file 3 [file supplementary]

## APPENDIX B.- NOMENCLATURE OF COMPOUNDS

| CODE       | KEGG CODE | NAME                                               |
|------------|-----------|----------------------------------------------------|
| A3IM P     | C04411    | (2R,3S)-3-Isopropylmalate in <i>P. aeruginosa</i>  |
| AC         | C00033    | Acetate in <i>P. aeruginosa</i>                    |
| AC Cv      | C00033    | Acetate in <i>C. vulgaris</i>                      |
| ACACCOAACP | C05744    | Acetoacetyl-[acyl-carrier protein]                 |
| ACACP      | C03939    | Acetyl-[acyl-carrier protein]                      |
| ACCOA Cv   | C00024    | Acetyl coenzyme A in <i>C. vulgaris</i>            |
| ACCOA P    | C00024    | Acetyl coenzyme A in <i>P. aeruginosa</i>          |
| ACLAC P    | C06010    | (S)-2-Acetolactate in <i>P. aeruginosa</i>         |
| ACO Cv     | C00417    | cis-Aconitate in <i>C. vulgaris</i>                |
| ACT Cv     | C00084    | Acetaldehyde in <i>C. vulgaris</i>                 |
| AcylCoA    | C00024    | Acetyl coenzyme A                                  |
| ADPGLC P   | C00498    | Adenosine diphosphoglucose in <i>P. aeruginosa</i> |
| AIM P      | C02504    | alpha-Isopropylmalate in <i>P. aeruginosa</i>      |
| AKG Cv     | C00026    | 2-Oxoglutarate in <i>C. vulgaris</i>               |
| AKG P      | C00026    | 2-Oxoglutarate in <i>P. aeruginosa</i>             |
| Ala Cv     | C00041    | L-Alanine in <i>C. vulgaris</i>                    |
| Ala P      | C00041    | L-Alanine in <i>P. aeruginosa</i>                  |
| ALMI c     | C00369    | Starch in chloroplast                              |
| AMP Cv     | C00020    | Adenosine 5'-monophosphate in <i>C. vulgaris</i>   |
| Arg Cv     | C00062    | L-Arginine in <i>C. vulgaris</i>                   |
| Arg P      | C00062    | L-Arginine in <i>P. aeruginosa</i>                 |
| ARO Cv     | C00826    | L-Aroenate in <i>C. vulgaris</i>                   |
| Aser Cv    | C00979    | O-Acetyl-L-serine in <i>C. vulgaris</i>            |
| Asn P      | C00152    | L-Asparagine in <i>P. aeruginosa</i>               |
| Asp Cv     | C00049    | L-Aspartate in <i>C. vulgaris</i>                  |
| Asp P      | C00049    | L-Aspartate in <i>P. aeruginosa</i>                |
| ASPSALD    | C00441    | L-Aspartate 4-semialdehyde in <i>P. aeruginosa</i> |
| ASPSALD Cv | C00441    | L-Aspartate 4-semialdehyde in <i>C. vulgaris</i>   |
| ATP Cv     | C00002    | Adenosine 5'-triphosphate in <i>C. vulgaris</i>    |
| ATP P      | C00002    | Adenosine 5'-triphosphate in <i>P. aeruginosa</i>  |
| BACP       | C05745    | Butyryl-[acyl-carrier protein]                     |
| BIO Cv     |           | Biomass of <i>Chlorella vulgaris</i>               |
| BIO P      |           | Biomass of <i>Pseudomonas aeruginosa</i>           |
| C14:0CoA   | C02593    | Tetradecanoyl-CoA                                  |
| C14OFS     | C06424    | Tetradecanoic acid                                 |
| C16:0CoA   | C00154    | Palmitoyl-CoA                                      |
| C16:1CoA   | C08362    | Palmitoleic acid                                   |
| C16:2CoA   | C05272    | trans-2-Hexadecenoyl-CoA                           |

|           |        |                                                                         |
|-----------|--------|-------------------------------------------------------------------------|
| C16:3CoA  | C05258 | (S)-3-Hydroxyhexadecanoyl-CoA                                           |
| C18:0CoA  | C00412 | Stearoyl-CoA                                                            |
| C18:1CoA  | C00712 | (9Z)-Octadecenoic acid                                                  |
| C18:2CoA  | C02050 | Linoleoyl-CoA                                                           |
| C18:3CoA  | C16162 | alpha-Linolenoyl-CoA                                                    |
| Ca        | C00076 | Calcium cation                                                          |
| CARBH     |        | Total carbohydrates                                                     |
| CD5P Cv   | C01302 | 1-(2-Carboxyphenylamino)-1-deoxy-D-ribulose 5-phosphate                 |
| CDPETH    | C00570 | Cytidine diphosphate ethanolamine                                       |
| CHL       | C01793 | Chlorophyll                                                             |
| Chla      | C05306 | Chlorophyll a                                                           |
| Chlb      | C05307 | Chlorophyll b                                                           |
| CHOR      | C00251 | Chorismate in <i>P. aeruginosa</i>                                      |
| CHOR Cv   | C00251 | Chorismate in <i>C. vulgaris</i>                                        |
| CIT Cv    | C00158 | Citrate in <i>C. vulgaris</i>                                           |
| CIT P     | C00158 | Citrate in <i>P. aeruginosa</i>                                         |
| CMP Cv    | C00055 | Cytidine-5'-monophosphate in <i>C. vulgaris</i>                         |
| CMPKDO    | N/A    | Cisteina monofosfato 2-alfa-desoxioctanoato                             |
| CO2 Cv    | C00011 | Carbon dioxide in <i>C. vulgaris</i>                                    |
| CO2 P     | C00011 | Carbon dioxide in <i>P. aeruginosa</i>                                  |
| CO2ext    | C00011 | External carbon dioxide                                                 |
| Cu        | C00070 | Copper                                                                  |
| Cys Cv    | C00097 | L-Cysteine in <i>C. vulgaris</i>                                        |
| Cys P     | C00097 | L-Cysteine in <i>P. aeruginosa</i>                                      |
| D3HBACP   | C04618 | (3R)-3-Hydroxybutanoyl-[acyl-carrier protein]                           |
| D3HDACP   | C16220 | (R)-3-Hydroxyoctadecanoyl-[acp]                                         |
| D3HDCOA   | C05264 | (S)-Hydroxydecanoyl-CoA                                                 |
| D3HDODACP | C05757 | (R)-3-Hydroxydodecanoyl-[acp]                                           |
| D3HDODCOA | C05262 | (S)-3-Hydroxydodecanoyl-CoA                                             |
| D3HHXACP  | C05747 | (R)-3-Hydroxyhexanoyl-[acp]                                             |
| D3HOACP   | C04620 | (3R)-3-Hydroxyoctanoyl-[acyl-carrier protein]                           |
| D3HOCOA   | C05266 | (S)-3-Hydroxyoctanoyl-CoA                                               |
| DACP      | C05755 | Decanoyl-[acyl-carrier protein]                                         |
| DAHP Cv   | C04691 | 2-Dehydro-3-deoxy-D-arabino-heptonate 7-phosphate in <i>C. vulgaris</i> |
| dAMP Cv   | C00360 | 2'-Deoxyadenosine 5'-phosphate in <i>C. vulgaris</i>                    |
| DAP c     | C00111 | Glycerone phosphate in chloroplast                                      |
| DAP Cv    | C00111 | Glycerone phosphate in <i>C. vulgaris</i>                               |
| DAP P     | C00111 | Glycerone phosphate in <i>P. aeruginosa</i>                             |
| dATP      | C00131 | 2'-Deoxyadenosine 5'-triphosphate                                       |
| dCMP Cv   | C00239 | Deoxycytidylic acid in <i>C. vulgaris</i>                               |
| dCTP      | C00458 | Deoxycytidine 5'-triphosphate                                           |

|            |        |                                                           |
|------------|--------|-----------------------------------------------------------|
| dGMP Cv    | C00362 | 2'-Deoxyguanosine 5'-monophosphate in <i>C. vulgaris</i>  |
| dGTP       | C00286 | 2'-Deoxyguanosine 5'-triphosphate                         |
| DHQ Cv     | C00944 | 3-Dehydroquininate in <i>C. vulgaris</i>                  |
| DHSK Cv    | C02637 | 3-Dehydroshikimate in <i>C. vulgaris</i>                  |
| DIAMPIM    | C00666 | LL-2,6-Diaminoheptanedioate                               |
| DIAMPIM Cv | C00666 | LL-2,6-Diaminoheptanedioate in <i>C. vulgaris</i>         |
| DNA Cv     | C00039 | Deoxyribonucleic acid of <i>C. vulgaris</i>               |
| dTMP Cv    | C00364 | Thymidine 5'-phosphate in <i>C. vulgaris</i>              |
| dTTP       | C11437 | 1-Deoxy-D-xylulose 5-phosphate                            |
| E4P c      | C00279 | D-Erythrose 4-phosphate in chloroplast                    |
| E4P Cv     | C00279 | D-Erythrose 4-phosphate in <i>C. vulgaris</i>             |
| E4P P      | C00279 | D-Erythrose 4-phosphate in <i>P. aeruginosa</i>           |
| EN6 Cv     | C15972 | Enzyme N6-(lipoyl)lysine in <i>C. vulgaris</i>            |
| EN6 P      | C15972 | Enzyme N6-(lipoyl)lysine in <i>P. aeruginosa</i>          |
| EN6d Cv    | C15973 | Enzyme N6-(dihydrolipoyl)lysine in <i>C. vulgaris</i>     |
| EN6d P     | C15973 | Enzyme N6-(dihydrolipoyl)lysine in <i>P. aeruginosa</i>   |
| EN6s       | C15972 | Lipoamide-E                                               |
| F6P c      | C05345 | beta-D-Fructose 6-phosphate in chloroplast                |
| F6P Cv     | C05345 | beta-D-Fructose 6-phosphate in <i>C. vulgaris</i>         |
| F6P P      | C05345 | beta-D-Fructose 6-phosphate in <i>P. aeruginosa</i>       |
| FDP c      | C05378 | beta-D-Fructose 1,6-bisphosphate in chloroplast           |
| FDP Cv     | C05378 | beta-D-Fructose 1,6-bisphosphate in <i>C. vulgaris</i>    |
| FDP P      | C05378 | beta-D-Fructose 1,6-bisphosphate in <i>P. aeruginosa</i>  |
| Fe         | C00023 | Iron                                                      |
| FUM Cv     | C00122 | Fumarate in <i>C. vulgaris</i>                            |
| FUM P      | C00122 | Fumarate in <i>P. aeruginosa</i>                          |
| G15L6P Cv  | C01236 | D-Glucono-1,5-lactone 6-phosphate in <i>C. vulgaris</i>   |
| G15L6P P   | C01236 | D-Glucono-1,5-lactone 6-phosphate in <i>P. aeruginosa</i> |
| G3P c      | C00118 | D-Glyceraldehyde 3-phosphate in chloroplast               |
| G3P Cv     | C00118 | D-Glyceraldehyde 3-phosphate in <i>C. vulgaris</i>        |
| G3P P      | C00118 | D-Glyceraldehyde 3-phosphate in <i>P. aeruginosa</i>      |
| G6P c      | C00668 | alpha-D-Glucose 6-phosphate in chloroplast                |
| G6P Cv     | C00668 | alpha-D-Glucose 6-phosphate in <i>C. vulgaris</i>         |
| G6P P      | C00668 | alpha-D-Glucose 6-phosphate in <i>P. aeruginosa</i>       |
| GL6P Cv    | C00345 | 6-Phospho-D-gluconate in <i>C. vulgaris</i>               |
| GL6P P     | C00345 | 6-Phospho-D-gluconate in <i>P. aeruginosa</i>             |
| GLC Cv     | C00267 | alpha-D-Glucose in <i>C. vulgaris</i>                     |
| GLC P      | C00267 | alpha-D-Glucose in <i>P. aeruginosa</i>                   |
| GLCext     | C00267 | External alpha-D-Glucose                                  |
| Gln Cv     | C00064 | L-Glutamine in <i>C. vulgaris</i>                         |
| Gln P      | C00064 | L-Glutamine in <i>P. aeruginosa</i>                       |

|             |        |                                                      |
|-------------|--------|------------------------------------------------------|
| Glu Cv      | C00025 | L-Glutamate in <i>C. vulgaris</i>                    |
| Glu P       | C00025 | L-Glutamate in <i>P. aeruginosa</i>                  |
| Gly Cv      | C00037 | Glycine in <i>C. vulgaris</i>                        |
| Gly P       | C00037 | Glycine in <i>P. aeruginosa</i>                      |
| GLYOx       | C00048 | Glyoxylate                                           |
| GMP Cv      | C00144 | Guanosine 5'-phosphate in <i>C. vulgaris</i>         |
| H Cv        | C00080 | Hydron in <i>C. vulgaris</i>                         |
| H m         | C00080 | Hydron in mitochondria                               |
| H P         | C00080 | Hydron in <i>P. aeruginosa</i>                       |
| HCO3 Cv     | C00288 | Bicarbonate in <i>C. vulgaris</i>                    |
| HHXACP      | C05749 | Hexanoyl-[acyl-carrier protein]                      |
| His Cv      | C00135 | L-Histidine in <i>C. vulgaris</i>                    |
| His P       | C00135 | L-Histidine in <i>P. aeruginosa</i>                  |
| Hser Cv     | C00263 | L-Homoserine in <i>C. vulgaris</i>                   |
| Hser P      | C00263 | L-Homoserine in <i>P. aeruginosa</i>                 |
| HTHP Cv     | C03972 | 2,3,4,5-Tetrahydrodipicolinate in <i>C. vulgaris</i> |
| I3GP Cv     | C03506 | Indoleglycerol phosphate in <i>C. vulgaris</i>       |
| ICIT Cv     | C00311 | Isocitrate in <i>C. vulgaris</i>                     |
| ICIT P      | C00311 | Isocitrate in <i>P. aeruginosa</i>                   |
| Iso Cv      | C00123 | L-Leucine in <i>C. vulgaris</i>                      |
| Iso P       | C00123 | L-Leucine in <i>P. aeruginosa</i>                    |
| K           | C00238 | Potassium cation                                     |
| Leu Cv      | C16439 | Leucine in <i>C. vulgaris</i>                        |
| Leu P       | C16439 | Leucine in <i>P. aeruginosa</i>                      |
| LIPID       |        | Lípidos totales                                      |
| Lys Cv      | C00047 | L-Lysine in <i>C. vulgaris</i>                       |
| Lys P       | C00047 | L-Lysine in <i>P. aeruginosa</i>                     |
| M2OX P      | C00233 | 4-Methyl-2-oxopentanoate in <i>P. aeruginosa</i>     |
| MAL Cv      | C00149 | (S)-Malate in <i>C. vulgaris</i>                     |
| MAL P       | C00149 | (S)-Malate in <i>P. aeruginosa</i>                   |
| MALACP      | C01209 | Malonyl-[acyl-carrier protein]                       |
| MALCOA      | C00083 | Malonyl coenzyme A                                   |
| MALT Cv     | C00208 | Maltose in <i>C. vulgaris</i>                        |
| MALT P      | C00208 | Maltose in <i>P. aeruginosa</i>                      |
| MALText     | C00208 | External maltose                                     |
| MDIAMPIM Cv | C00680 | meso-2,6-Diaminoheptanedioate                        |
| Met Cv      | C00073 | L-Methionine in <i>C. vulgaris</i>                   |
| Met P       | C00073 | L-Methionine in <i>P. aeruginosa</i>                 |
| Mg          | C00305 | Magnesium cation                                     |
| MITFS       |        | Fatty acids comprised between 16 and 18 carbon atoms |
| Mn          | C00034 | Manganese                                            |

|          |        |                                                                             |
|----------|--------|-----------------------------------------------------------------------------|
| MTHF     | C00143 | 5,10-Methylenetetrahydrofolate                                              |
| NADH Cv  | C00004 | Reduced nicotinamide adenine dinucleotide in <i>C. vulgaris</i>             |
| NADH P   | C00004 | Reduced nicotinamide adenine dinucleotide in <i>P. aeruginosa</i>           |
| NADPH Cv | C00005 | Reduced nicotinamide adenine dinucleotide phosphate in <i>C. vulgaris</i>   |
| NADPH P  | C00005 | Reduced nicotinamide adenine dinucleotide phosphate in <i>P. aeruginosa</i> |
| NDPHEP   |        | Mannoheptose diphosphate nucleotide                                         |
| NH3 Cv   | C00014 | Ammonia in <i>C. vulgaris</i>                                               |
| NH3 P    | C00014 | Ammonia in <i>P. aeruginosa</i>                                             |
| NH3ext   | C00014 | External ammonia                                                            |
| NO3ext   | C00244 | External nitrate                                                            |
| O2 Cv    | C00007 | Oxygen in <i>C. vulgaris</i>                                                |
| O2 P     | C00007 | Oxygen in <i>P. aeruginosa</i>                                              |
| O2ext    | C00007 | External oxygen                                                             |
| OA Cv    | C00036 | Oxaloacetate in <i>C. vulgaris</i>                                          |
| OA P     | C00036 | Oxaloacetate in <i>P. aeruginosa</i>                                        |
| OACP     | C05752 | Octanoyl-[acyl-carrier protein]                                             |
| OAS P    | C05379 | Oxalosuccinate in <i>P. aeruginosa</i>                                      |
| OHMYRAC  | C04688 | (3R)-3-Hydroxytetradecanoyl-[acyl-carrier protein]                          |
| OXOB P   | C00141 | 3-Methyl-2-oxobutanoic acid in <i>P. aeruginosa</i>                         |
| Pasp Cv  | C03082 | 4-Phospho-L-aspartate in <i>C. vulgaris</i>                                 |
| PC Cv    | C00157 | Phosphatidylcholine in <i>C. vulgaris</i>                                   |
| PE Cv    | C00350 | Phosphatidylethanolamine in <i>C. vulgaris</i>                              |
| PEP Cv   | C00074 | Phosphoenolpyruvate in <i>C. vulgaris</i>                                   |
| PEP P    | C00074 | Phosphoenolpyruvate in <i>P. aeruginosa</i>                                 |
| PG Cv    | C00344 | Phosphatidylglycerol in <i>C. vulgaris</i>                                  |
| PG13 c   | C00236 | 3-Phospho-D-glyceroyl phosphate in chloroplast                              |
| PG13 Cv  | C00236 | 3-Phospho-D-glyceroyl phosphate in <i>C. vulgaris</i>                       |
| PG13 P   | C00236 | 3-Phospho-D-glyceroyl phosphate in <i>P. aeruginosa</i>                     |
| PG2 Cv   | C00631 | 2-Phospho-D-glycerate in <i>C. vulgaris</i>                                 |
| PG2 P    | C00631 | 2-Phospho-D-glycerate in <i>P. aeruginosa</i>                               |
| PG3 c    | C00197 | 3-Phospho-D-glycerate in chloroplast                                        |
| PG3 Cv   | C00197 | 3-Phospho-D-glycerate in <i>C. vulgaris</i>                                 |
| PG3 P    | C00197 | 3-Phospho-D-glycerate in <i>P. aeruginosa</i>                               |
| PHAs     |        | Poly (3-hydroxyalkanoates)                                                  |
| PHAsext  |        | External poly (3-hydroxyalkanoates)                                         |
| PHD      |        | Poly (3-hydroxydecanoate)                                                   |
| PHDOD    |        | Poly (3-hydroxydecanoate)                                                   |
| Phe Cv   | C00079 | L-Phenylalanine in <i>C. vulgaris</i>                                       |
| Phe P    | C00079 | L-Phenylalanine in <i>P. aeruginosa</i>                                     |
| Pho      |        | Photon                                                                      |
| PHO      |        | Poly (3-hydroxyoctanoate)                                                   |

|           |        |                                                                        |
|-----------|--------|------------------------------------------------------------------------|
| PHser Cv  | C01102 | O-Phospho-L-homoserine in <i>C. vulgaris</i>                           |
| Pi Cv     | C06262 | Phosphorus in <i>C. vulgaris</i>                                       |
| Pi P      | C06262 | Phosphorus in <i>P. aeruginosa</i>                                     |
| Piext     | C06262 | External phosphorus                                                    |
| PO4 Cv    | C00009 | Phosphate in <i>C. vulgaris</i>                                        |
| PO4ext    | C00009 | External phosphate                                                     |
| PP3 Cv    | C03232 | 3-Phosphonooxypyruvate in <i>C. vulgaris</i>                           |
| PRE Cv    | C00254 | Prephenate in <i>C. vulgaris</i>                                       |
| PRO Cv    |        | Total protein in <i>C. vulgaris</i>                                    |
| Pro P     | C00148 | L-Proline in <i>P. aeruginosa</i>                                      |
| Prol Cv   | C00148 | L-Proline in <i>C. vulgaris</i>                                        |
| PRPP      | C00119 | 5-Phospho-alpha-D-ribose 1-diphosphate                                 |
| PRPP Cv   | C00119 | 5-Phospho-alpha-D-ribose 1-diphosphate in <i>C. vulgaris</i>           |
| Pser Cv   | C01005 | O-Phospho-L-serine in <i>C. vulgaris</i>                               |
| PYR Cv    | C00022 | Pyruvate in <i>C. vulgaris</i>                                         |
| PYR P     | C00022 | Pyruvate in <i>P. aeruginosa</i>                                       |
| QH P      | C15603 | Hydroquinone in <i>P. aeruginosa</i>                                   |
| QH2 P     | C00390 | Ubiquinol in <i>P. aeruginosa</i>                                      |
| R5P c     | C00117 | D-Ribose 5-phosphate in chloroplast                                    |
| R5P Cv    | C00117 | D-Ribose 5-phosphate in <i>C. vulgaris</i>                             |
| R5P P     | C00117 | D-Ribose 5-phosphate in <i>P. aeruginosa</i>                           |
| RATP      |        | Adenosine triphosphate ribonucleotide                                  |
| RCTP      |        | Cytosine triphosphate ribonucleotide                                   |
| RGTP      |        | Guanine triphosphate ribonucleotide                                    |
| RL5P c    | C00199 | D-Ribulose 5-phosphate in chloroplast                                  |
| RL5P Cv   | C00199 | D-Ribulose 5-phosphate in <i>C. vulgaris</i>                           |
| RL5P P    | C00199 | D-Ribulose 5-phosphate in <i>P. aeruginosa</i>                         |
| RNA Cv    | C00046 | Ribonucleic acid of <i>C. vulgaris</i>                                 |
| RuBP c    | C01182 | D-Ribulose 1,5-bisphosphate in chloroplast                             |
| RUTP      |        | Uridine triphosphate ribonucleotide                                    |
| S P       | C00087 | Sulfur in <i>P. aeruginosa</i>                                         |
| S17P c    | C00447 | Sedoheptulose 1,7-bisphosphate in chloroplast                          |
| S7P c     | C05382 | Sedoheptulose 7-phosphate in chloroplast                               |
| S7P Cv    | C05382 | Sedoheptulose 7-phosphate in <i>C. vulgaris</i>                        |
| S7P P     | C05382 | Sedoheptulose 7-phosphate in <i>P. aeruginosa</i>                      |
| Ser Cv    | C00065 | L-Serine in <i>C. vulgaris</i>                                         |
| Ser P     | C00065 | L-Serine in <i>P. aeruginosa</i>                                       |
| Shi Cv    | C00493 | Shikimate in <i>C. vulgaris</i>                                        |
| Shi35P Cv | C01269 | 5-O-(1-Carboxyvinyl)-3-phosphoshikimate in <i>C. vulgaris</i>          |
| Shi3P Cv  | C03175 | Shikimate 3-phosphate in <i>C. vulgaris</i>                            |
| sHTHP Cv  | C20258 | (2S,4S)-4-Hydroxy-2,3,4,5-tetrahydrodipicolinate in <i>C. vulgaris</i> |

|           |        |                                                                                                     |
|-----------|--------|-----------------------------------------------------------------------------------------------------|
| SO4 Cv    | C00059 | Sulfate in <i>C. vulgaris</i>                                                                       |
| SO4 P     | C00059 | Sulfate in <i>P. aeruginosa</i>                                                                     |
| SO4ext    | C00059 | External sulfate                                                                                    |
| SSE Cv    | C16255 | [Dihydrolipoyllysine-residue acetyltransferase] S-acetyldihydrolipoyllysine in <i>C. vulgaris</i>   |
| SSE P     | C16255 | [Dihydrolipoyllysine-residue acetyltransferase] S-acetyldihydrolipoyllysine in <i>P. aeruginosa</i> |
| SUC Cv    | C00042 | Succinate in <i>C. vulgaris</i>                                                                     |
| SUC P     | C00042 | Succinate in <i>P. aeruginosa</i>                                                                   |
| SUCCOA Cv | C00091 | Succinyl-CoA in <i>C. vulgaris</i>                                                                  |
| SUCCOA P  | C00091 | Succinyl-CoA in <i>P. aeruginosa</i>                                                                |
| T P       | C01083 | Trehalose in <i>P. aeruginosa</i>                                                                   |
| T2hPP Cv  | C05125 | 2-(alpha-Hydroxyethyl)thiamine diphosphate in <i>C. vulgaris</i>                                    |
| T2hPP P   | C05125 | 2-(alpha-Hydroxyethyl)thiamine diphosphate in <i>P. aeruginosa</i>                                  |
| T3hPP Cv  | C05381 | 3-Carboxy-1-hydroxypropyl-ThPP in <i>C. vulgaris</i>                                                |
| T3hPP P   | C05381 | 3-Carboxy-1-hydroxypropyl-ThPP in <i>P. aeruginosa</i>                                              |
| TAG Cv    | C00422 | Triacylglycerol in <i>C. vulgaris</i>                                                               |
| TDPGLCS   |        | Thymidine-5-diphosphate glucosamine                                                                 |
| Thr Cv    | C00188 | L-Threonine in <i>C. vulgaris</i>                                                                   |
| Thr P     | C00188 | L-Threonine in <i>P. aeruginosa</i>                                                                 |
| TPP Cv    | C00068 | Thiamin diphosphate in <i>C. vulgaris</i>                                                           |
| TPP P     | C00068 | Thiamin diphosphate in <i>P. aeruginosa</i>                                                         |
| Trp Cv    | C00525 | D-Tryptophan in <i>C. vulgaris</i>                                                                  |
| Trp P     | C00525 | D-Tryptophan in <i>P. aeruginosa</i>                                                                |
| Tyr Cv    | C00082 | L-Tyrosine in <i>C. vulgaris</i>                                                                    |
| Tyr P     | C00082 | L-Tyrosine in <i>P. aeruginosa</i>                                                                  |
| UDPGAL Cv | C00052 | UDP-alpha-D-galactose in <i>C. vulgaris</i>                                                         |
| UDPGLC    | C00029 | UDP-glucose                                                                                         |
| UDPGLC Cv | C00029 | UDP-glucose in <i>C. vulgaris</i>                                                                   |
| UDPNAG Cv | C02200 | UDP-glucosamine in <i>C. vulgaris</i>                                                               |
| UDPNAG P  | C02200 | UDP-glucosamine in <i>P. aeruginosa</i>                                                             |
| UDPNAM P  | C01050 | UDP-N-acetylmuramate in <i>P. aeruginosa</i>                                                        |
| UMP Cv    | C00105 | Uridine monophosphate in <i>C. vulgaris</i>                                                         |
| Val Cv    | C00183 | L-Valine in <i>C. vulgaris</i>                                                                      |
| Val P     | C00183 | L-Valine in <i>P. aeruginosa</i>                                                                    |
| VL1 Cv    | C00108 | Anthranilate in <i>C. vulgaris</i>                                                                  |
| VL15P Cv  | C04302 | N-(5-Phospho-D-ribosyl)anthranilate in <i>C. vulgaris</i>                                           |
| X5P c     | C00231 | D-Xylulose 5-phosphate in chloroplast                                                               |
| X5P Cv    | C00231 | D-Xylulose 5-phosphate in <i>C. vulgaris</i>                                                        |
| X5P P     | C00231 | D-Xylulose 5-phosphate in <i>P. aeruginosa</i>                                                      |
| Zn        | C00038 | Zinc                                                                                                |
