# Supplementary material for: Metabolic Pathway Analysis for Nutrient Removal of the Consortium between <em>C. vulgaris</em> and <em>P. aeruginosa</em>
Source: Preprints.org preprint supplement (doi:10.20944/preprints201903.0002.v1), 2019-03-01
Supplement: Supplementary file 4 [file supplementary]

| Reaction number | Metabolism        | E.C. number |
|-----------------|-------------------|-------------|
| 1               | Photosynthesis    | PS1-PSII    |
| 2               | Photosynthesis    | N/A         |
| 3               | Photosynthesis    | 3.6.3.14    |
| 4               | External exchange |             |
| 5               | External exchange |             |
| 6               | Calvin cycle      | 4.2.1.1     |
| 7               | Calvin cycle      | 4.1.1.39    |
| 8               | Calvin cycle      | 2.7.2.3     |
| 9               | Calvin cycle      | 1.2.1.13    |
| 10              | Internal exchange |             |
| 11              | Calvin cycle      | 5.3.1.1     |
| 12              | Calvin cycle      | 4.1.2.13    |
| 13              | Calvin cycle      | 3.1.3.11    |
| 14              | Calvin cycle      | 5.3.1.9     |
| 15              | Calvin cycle      | 2.2.1.1     |
| 16              | Calvin cycle      | 4.1.2.13    |
| 17              | Calvin cycle      | 3.1.3.37    |
| 18              | Calvin cycle      | 2.2.1.1     |
| 19              | Calvin cycle      | 5.1.3.1     |
| 20              | Calvin cycle      | 5.3.1.6     |
| 21              | Calvin cycle      | 2.7.1.19    |
| 22              | External exchange |             |
| 23              | Glucolysis        | 2.7.1.1     |
| 24              | Glucolysis        | 5.3.1.9     |
| 25              | Glucolysis        | 2.7.1.11    |
| 26              | Glucolysis        | 3.1.3.11    |
| 27              | Glucolysis        | 4.1.2.13    |
| 28              | Glucolysis        | 5.3.1.1     |
| 29              | Glucolysis        | 1.2.1.12    |
| 30              | Glucolysis        | 2.7.2.3     |
| 31              | Glucolysis        | 1.2.1.9     |
| 32              | Glucolysis        | 5.4.2.12    |
| 33              | Glucolysis        | 4.2.1.11    |
| 34              | Glucolysis        | 2.7.1.40    |

|    |                         |          |
|----|-------------------------|----------|
| 35 | Glucolysis              | 1.2.4.1  |
| 36 | Glucolysis              | 4.1.1.1  |
| 37 | Glucolysis              | 1.2.1.3  |
| 38 | Glucolysis              | 6.2.1.1  |
| 39 | Krebs cycle             | 6.4.1.1  |
| 40 | Krebs cycle             | 2.3.3.1  |
| 41 | Krebs cycle             | 4.2.1.3  |
| 42 | Krebs cycle             | 4.2.1.3  |
| 43 | Krebs cycle             | 1.1.1.41 |
| 44 | Krebs cycle             | 1.2.4.2  |
| 45 | Krebs cycle             | 1.2.4.2  |
| 46 | Krebs cycle             | 2.3.1.61 |
| 47 | Krebs cycle             | 1.8.1.4  |
| 48 | Krebs cycle             | 6.2.1.5  |
| 49 | Krebs cycle             | 1.3.5.1  |
| 50 | Krebs cycle             | 4.2.1.2  |
| 51 | Krebs cycle             | 1.1.1.37 |
| 52 | Krebs cycle             | 4.1.1.49 |
| 53 | Pentose Phosphate       | 1.1.1.49 |
| 54 | Pentose Phosphate       | 3.1.1.31 |
| 55 | Pentose Phosphate       | 1.1.1.44 |
| 56 | Pentose Phosphate       | 5.3.1.6  |
| 57 | Pentose Phosphate       | 5.1.3.1  |
| 58 | Pentose Phosphate       | 2.2.1.1  |
| 59 | Pentose Phosphate       | 2.2.1.1  |
| 60 | Pentose Phosphate       | 2.2.1.2  |
| 61 | Pentose Phosphate       | 2.7.6.1  |
| 62 | Fatty acid biosynthesis |          |
| 63 | Fatty acid biosynthesis |          |
| 64 | Fatty acid biosynthesis |          |
| 65 | Fatty acid biosynthesis |          |
| 66 | Fatty acid biosynthesis |          |
| 67 | Fatty acid biosynthesis |          |
| 68 | Fatty acid biosynthesis |          |
| 69 | Fatty acid biosynthesis |          |
| 70 | Fatty acid biosynthesis |          |
| 71 | Fatty acid biosynthesis |          |
| 72 | Fatty acid biosynthesis | 2.3.1.20 |

|     |                                        |             |
|-----|----------------------------------------|-------------|
| 73  | Oxidative phosphorylation              |             |
| 74  | Oxidative phosphorylation              | 3.6.3.14    |
| 75  | Assimilation of Nitrogen               | NR, 1.7.7.1 |
| 76  | Assimilation of Nitrogen               | 1.4.1.4     |
| 77  | Assimilation of Nitrogen               | 6.3.1.2     |
| 78  | Asimilación de Nitrógeno               | 1.4.1.14    |
| 79  | Amino acid biosynthesis: Alanine       | 2.6.1.2     |
| 80  | Amino acid biosynthesis: Aspartate     | 2.6.1.1     |
| 81  | Amino acid biosynthesis: Serine        | 1.1.1.95    |
| 82  | Amino acid biosynthesis: Serine        | 2.6.1.52    |
| 83  | Amino acid biosynthesis: Serine        | 3.1.3.3     |
| 84  | Amino acid biosynthesis: Glycine       |             |
| 85  | Amino acid biosynthesis: Homoserin     | 1.1.1.3     |
| 86  | Amino acid biosynthesis: Homoserin     | 2.7.1.39    |
| 87  | Amino acid biosynthesis: Homoserin     | 4.2.3.1     |
| 88  | Amino acid biosynthesis: Proline       |             |
| 89  | Amino acid biosynthesis: Arginine      |             |
| 90  | Amino acid biosynthesis: Cysteine      | 2.3.1.30    |
| 91  | Sulphate assimilation                  |             |
| 92  | Amino acid biosynthesis: Cysteine      | 2.5.1.47    |
| 93  | Amino acid biosynthesis: Histidine     |             |
| 94  | Amino acid biosynthesis: Isoleucine    |             |
| 95  | Amino acid biosynthesis: Leucine       |             |
| 96  | Amino acid biosynthesis: Lysine        | 2.7.2.4     |
| 97  | Amino acid biosynthesis: Lysine        | 1.2.1.11    |
| 98  | Amino acid biosynthesis: Lysine        | 4.3.3.7     |
| 99  | Amino acid biosynthesis: Lysine        | 1.17.1.8    |
| 100 | Amino acid biosynthesis: Lysine        | 2.6.1.83    |
| 101 | Amino acid biosynthesis: Lysine        | 5.1.1.7     |
| 102 | Amino acid biosynthesis: Lysine        | 4.1.1.20    |
| 103 | Amino acid biosynthesis: Methionine    |             |
| 104 | Amino acid biosynthesis: Phenylalanine |             |
| 105 | Amino acid biosynthesis: Tryptophan    | 4.1.3.27    |
| 106 | Amino acid biosynthesis: Tryptophan    | 2.4.2.18    |
| 107 | Amino acid biosynthesis: Tryptophan    | 5.3.1.24    |
| 108 | Amino acid biosynthesis: Tryptophan    | 4.1.1.48    |
| 109 | Amino acid biosynthesis: Tryptophan    | 4.2.1.20    |

|     |                                   |          |
|-----|-----------------------------------|----------|
| 110 | Amino acid biosynthesis: Tyrosine | 2.5.1.54 |
| 111 | Amino acid biosynthesis: Tyrosine | 4.2.3.4  |
| 112 | Amino acid biosynthesis: Tyrosine | 4.2.1.10 |
| 113 | Amino acid biosynthesis: Tyrosine | 1.1.1.25 |
| 114 | Amino acid biosynthesis: Tyrosine | 2.7.1.71 |
| 115 | Amino acid biosynthesis: Tyrosine | 2.5.1.19 |
| 116 | Amino acid biosynthesis: Tyrosine | 4.2.3.5  |
| 117 | Amino acid biosynthesis: Tyrosine | 5.4.99.5 |
| 118 | Amino acid biosynthesis: Tyrosine | 2.6.1.78 |
| 119 | Amino acid biosynthesis: Tyrosine | 1.3.1.78 |
| 120 | Amino acid biosynthesis: Valine   |          |
| 121 | Nucleic acid synthesis            |          |
| 122 | Nucleic acid synthesis            |          |
| 123 | Nucleic acid synthesis            |          |
| 124 | Nucleic acid synthesis            |          |
| 125 | Nucleic acid synthesis            |          |
| 126 | Nucleic acid synthesis            |          |
| 127 | Nucleic acid synthesis            |          |
| 128 | Nucleic acid synthesis            |          |
| 129 | Synthesis of carbohydrates        |          |
| 130 | Synthesis of carbohydrates        |          |
| 131 | Synthesis of carbohydrates        |          |
| 132 | Synthesis of glycerophospholipids |          |
| 133 | Synthesis of glycerophospholipids |          |
| 134 | Synthesis of glycerophospholipids |          |
| 135 | Synthesis of chlorophyll          |          |
| 136 | Synthesis of chlorophyll          |          |
| 137 | Maltose synthesis                 | 2.7.7.27 |
| 138 | Maltose synthesis                 | 3.2.1.2  |
| 139 | External exchange                 |          |
| 140 | Synthesis of macromolecules       |          |
| 141 | Synthesis of macromolecules       |          |
| 142 | Synthesis of macromolecules       |          |
| 143 | Synthesis of macromolecules       |          |

|     |                                          |                  |
|-----|------------------------------------------|------------------|
| 144 | Synthesis of macromolecules              |                  |
| 145 | Synthesis of chlorophyll                 |                  |
| 146 | External exchange                        |                  |
| 147 | Biomass synthesis ( <i>C. vulgaris</i> ) |                  |
| 148 | Metabolism of starch                     |                  |
| 149 | Metabolism of starch                     | 5.4.99.16        |
| 150 | Metabolism of starch                     | 3.2.1.28         |
| 151 | Glucolysis / Gluconeogenesis             |                  |
| 152 | Glucolysis / Gluconeogenesis             | 2.7.1.2          |
| 153 | Glucolysis / Gluconeogenesis             | 5.3.1.9          |
| 154 | Glucolysis / Gluconeogenesis             | 3.1.3.11         |
| 155 | Glucolysis / Gluconeogenesis             | 4.1.2.13         |
| 156 | Glucolysis / Gluconeogenesis             | 5.3.1.1          |
| 157 | Glucolysis / Gluconeogenesis             | 1.2.1.12         |
| 158 | Glucolysis / Gluconeogenesis             | 2.7.2.3          |
| 159 | Glucolysis / Gluconeogenesis             | 1.2.1.9          |
| 160 | Glucolysis / Gluconeogenesis             | 5.4.2.12         |
| 161 | Glucolysis / Gluconeogenesis             | 4.2.1.11         |
| 162 | Glucolysis / Gluconeogenesis             | 2.7.1.40         |
| 163 | Glucolysis / Gluconeogenesis             | 1.2.4.1          |
| 164 | Glucolysis / Gluconeogenesis             | 1.2.4.1          |
| 165 | Glucolysis / Gluconeogenesis             | 2.3.1.12         |
| 166 | Glucolysis / Gluconeogenesis             | 1.8.1.4          |
| 167 | Glucolysis / Gluconeogenesis             | 4.1.1.49         |
| 168 | Glucolysis / Gluconeogenesis             | 6.4.1.1          |
| 169 | Krebs cycle                              | 2.3.3.1          |
| 170 | Krebs cycle                              | 4.2.1.3          |
| 171 | Krebs cycle                              | 1.1.1.42         |
| 172 | Krebs cycle                              | 1.1.1.42         |
| 173 | Krebs cycle                              | 1.2.4.2          |
| 174 | Krebs cycle                              | 1.2.4.2          |
| 175 | Krebs cycle                              | 2.3.1.61         |
| 176 | Krebs cycle                              | 6.2.1.5          |
| 177 | Krebs cycle                              | 1.3.5.1, 1.3.5.4 |

|     |                                     |           |
|-----|-------------------------------------|-----------|
| 178 | Krebs cycle                         | 4.2.1.2   |
| 179 | Krebs cycle                         | 1.1.5.4   |
| 180 | Glioxylate Cycle                    | 4.1.3.1   |
| 181 | Glioxylate Cycle                    | 2.3.3.9   |
| 182 | Glioxylate Cycle                    | 1.1.1.38  |
| 183 | Pentose Phosphate                   |           |
| 184 | Pentose Phosphate                   | 1.1.1.49  |
| 185 | Pentose Phosphate                   | 3.1.1.31  |
| 186 | Pentose Phosphate                   | 1.1.1.44  |
| 187 | Pentose Phosphate                   | 5.1.3.1   |
| 188 | Pentose Phosphate                   | 5.3.1.6   |
| 189 | Pentose Phosphate                   | 2.2.1.1   |
| 190 | Pentose Phosphate                   | 2.2.1.2   |
| 191 | Pentose Phosphate                   | 2.2.1.1   |
| 192 | Histidine metabolism                | 2.7.6.1   |
| 193 | Oxidative phosphorylation           | 1.6.1.1   |
| 194 | Oxidative phosphorylation           | 1.6.5.3   |
| 195 | Oxidative phosphorylation           | 1.10.3.10 |
| 196 | Oxidative phosphorylation           |           |
| 197 | Oxidative phosphorylation           |           |
| 198 | Oxidative phosphorylation           | 3.6.3.14  |
| 199 | Acetate Biosynthesis                | 2.7.2.1   |
| 200 | Amino acid biosynthesis: Glutamate  |           |
| 201 | Amino acid biosynthesis: Glutamate  | 1.4.1.4   |
| 202 | Amino acid biosynthesis: Aspartate  | 2.6.1.1   |
| 203 | Amino acid biosynthesis: Asparagine | 3.5.1.1   |
| 204 | Amino acid biosynthesis: Glutamine  | 6.3.1.2   |
| 205 | Amino acid biosynthesis: Alanine    | 2.6.1.2   |
| 206 | Amino acid biosynthesis: Proline    | 1.2.1.41  |
| 207 | Amino acid biosynthesis: Arginine   | 2.3.1.1   |
|     |                                     | 2.7.2.8   |
|     |                                     | 1.2.1.38  |
|     |                                     | 2.6.1.11  |
|     |                                     | 3.5.1.16  |
|     |                                     | 6.3.5.5   |
|     |                                     | 2.1.3.3   |
|     |                                     | 6.3.4.5   |

|     |                                                         |                 |
|-----|---------------------------------------------------------|-----------------|
|     |                                                         | 4.3.2.1         |
| 208 | Amino acid biosynthesis: Valine, leucine and isoleucine | 2.2.1.6         |
| 209 | Amino acid biosynthesis: Valine, leucine and isoleucine | 1.1.1.86        |
| 210 | Amino acid biosynthesis: Valine, leucine and isoleucine | 2.6.1.42        |
| 211 | Amino acid biosynthesis: Valine, leucine and isoleucine | 2.3.3.13        |
| 212 | Biosynthesis of branched amino acids                    | 4.2.1.33        |
| 213 | Biosynthesis of branched amino acids                    | 1.1.1.85        |
| 214 | Amino acid biosynthesis: Valine, leucine and isoleucine | 2.6.1.42        |
| 215 | Amino acid biosynthesis: Valine, leucine and isoleucine |                 |
| 216 | Amino acid biosynthesis: Phenylalanine                  |                 |
| 217 | Amino acid biosynthesis: Phenylalanine                  |                 |
| 218 | Amino acid biosynthesis: Tyrosine                       |                 |
| 219 | Amino acid biosynthesis: Tryptophan                     | 4.1.3.27        |
|     |                                                         | 2.4.2.18        |
|     |                                                         | 5.3.1.24        |
|     |                                                         | 4.2.1.20        |
| 220 | Amino acid biosynthesis: Histidine                      | 2.5.1.7         |
|     |                                                         | 3.5.4.19        |
|     |                                                         | 5.3.1.16        |
|     |                                                         | 2.4.2.-         |
|     |                                                         | 2.4.2.- 4.1.3.- |
|     |                                                         | 4.2.1.19        |
|     |                                                         | 2.6.1.9         |
| 221 | Amino acid biosynthesis: Serine                         | 1.1.1.23        |
|     |                                                         | 1.1.1.95        |
|     |                                                         | 2.6.1.52        |
| 222 | Amino acid biosynthesis: Glycine                        | 3.1.3.3         |
| 223 | Amino acid biosynthesis: Glycine                        | 1.5.1.20        |
| 224 | Sulphate assimilation                                   | 2.1.2.1         |
| 225 | Sulphate assimilation                                   |                 |
|     |                                                         | 2.7.7.4         |
|     |                                                         | 2.7.1.25        |
|     |                                                         | 1.8.4.8         |
|     |                                                         | 2.1.1.107       |
| 226 | Amino acid biosynthesis: Cysteine                       | 1.8.1.2         |
|     |                                                         | 2.3.1.30        |
|     |                                                         | 2.5.1.47        |

|     |                                     |           |
|-----|-------------------------------------|-----------|
|     |                                     | 2.5.1.47  |
| 227 | Amino acid biosynthesis: Homoserin  | 2.7.2.4   |
|     |                                     | 1.2.1.11  |
| 228 | Amino acid biosynthesis: Homoserin  | 1.1.1.3   |
| 229 | Amino acid biosynthesis: Threonine  | 2.7.1.39  |
|     |                                     | 4.2.3.1   |
|     |                                     | 4.3.3.7   |
|     |                                     | 1.17.1.8  |
| 230 | Amino acid biosynthesis: Methionine | 2.6.1.17  |
|     |                                     | 2.3.1.117 |
|     |                                     | 3.5.1.18  |
|     |                                     | 5.1.1.7   |
| 231 |                                     | 2.3.1.46  |
|     |                                     | 4.4.1.11  |
|     | Amino acid biosynthesis: Methionine | 4.4.1.1   |
|     |                                     | 2.1.1.14  |
|     |                                     | 2.1.1.13  |
| 232 | Amino acid biosynthesis: Lysine     | 4.1.1.20  |
|     |                                     | 2.4.2.14  |
|     |                                     | 6.3.4.13  |
|     |                                     | 2.1.2.2   |
|     |                                     | 6.3.3.1   |
|     |                                     | 6.3.5.3   |
| 233 | Synthesis of ribonucleic acids      | 4.1.1.21  |
|     |                                     | 4.1.1.21  |
|     |                                     | 6.3.4.4   |
|     |                                     | 4.3.2.2   |
|     |                                     | 2.1.2.3   |
|     |                                     | 6.3.2.6   |
|     |                                     | 2.7.4.3   |
|     |                                     | 6.3.5.2   |
| 234 | Synthesis of ribonucleic acids      | 1.1.1.205 |
|     |                                     | 2.7.4.8   |
|     |                                     | 2.1.3.2   |
|     |                                     | 3.5.2.3   |
| 235 | Synthesis of ribonucleic acids      | 1.3.98.1  |
|     |                                     | 2.4.2.10  |
|     |                                     | 4.1.1.23  |
|     |                                     | 2.7.4.22  |
|     |                                     | 2.7.4.6   |



|     |                                     |           |
|-----|-------------------------------------|-----------|
| 236 | Synthesis of ribonucleic acids      | 6.3.4.2   |
|     |                                     | 2.7.4.14  |
| 237 | Synthesis of deoxyribonucleic acids | 1.17.4.1  |
|     |                                     | 2.7.4.6   |
| 238 | Synthesis of deoxyribonucleic acids | 1.17.4.1  |
|     |                                     | 2.7.4.6   |
| 239 | Synthesis of deoxyribonucleic acids | 1.17.4.1  |
|     |                                     | 2.7.4.6   |
| 240 | Synthesis of deoxyribonucleic acids | 1.17.4.1  |
|     |                                     | 2.7.4.6   |
| 241 | Synthesis of MITFS                  | 2.3.1.41  |
| 242 | Synthesis of lipopolysaccharides    | 5.4.2.8   |
|     |                                     | 2.7.7.9   |
| 243 | Synthesis of lipopolysaccharides    |           |
| 244 | Synthesis of lipopolysaccharides    | 2.3.1.41  |
| 245 | Synthesis of lipopolysaccharides    | 2.3.1.41  |
| 246 | Synthesis of lipopolysaccharides    | 2.7.7.38  |
| 247 | Synthesis of lipopolysaccharides    |           |
| 248 | Synthesis of lipopolysaccharides    |           |
| 249 | Synthesis of peptidoglycans         | 2.6.1.16  |
| 250 | Synthesis of peptidoglycans         | 2.5.1.55  |
| 251 | Synthesis of peptidoglycans         | 2.4.1.21  |
| 252 | Synthesis of polyhydroxyalkanoates  | 6.4.1.2   |
| 253 | Synthesis of polyhydroxyalkanoates  | 2.3.1.39  |
| 254 | Synthesis of polyhydroxyalkanoates  | 2.3.1.38  |
| 255 | Synthesis of polyhydroxyalkanoates  | 2.3.1.41  |
| 256 | Synthesis of polyhydroxyalkanoates  | 1.1.1.100 |
| 257 | Synthesis of polyhydroxyalkanoates  | 4.2.1.59  |
| 258 | Synthesis of polyhydroxyalkanoates  | 1.3.1.9   |
| 259 | Synthesis of polyhydroxyalkanoates  |           |
| 260 | Synthesis of polyhydroxyalkanoates  |           |
| 261 | Synthesis of polyhydroxyalkanoates  |           |
| 262 | Synthesis of polyhydroxyalkanoates  |           |
| 263 | Synthesis of polyhydroxyalkanoates  |           |
| 264 | Synthesis of polyhydroxyalkanoates  |           |
| 265 | Synthesis of polyhydroxyalkanoates  |           |
| 266 | Synthesis of polyhydroxyalkanoates  | 2.3.1.-   |
| 267 | Synthesis of polyhydroxyalkanoates  |           |

|     |                                            |         |
|-----|--------------------------------------------|---------|
| 268 | Synthesis of polyhydroxyalkanoates         | 2.3.1.- |
| 269 | Synthesis of polyhydroxyalkanoates         |         |
| 270 | Synthesis of polyhydroxyalkanoates         | 2.3.1.- |
| 271 | Synthesis of polyhydroxyalkanoates         | 2.3.1.- |
| 272 | Synthesis of polyhydroxyalkanoates         |         |
| 273 | Biomass synthesis ( <i>P. aeruginosa</i> ) |         |
| 274 | Exchange Flows                             |         |
| 275 | Exchange Flows                             |         |
| 276 | Exchange Flows                             |         |
| 277 | Exchange Flows                             |         |
| 278 | Exchange Flows                             |         |
| 279 | Exchange Flows                             |         |
| 280 | Exchange Flows                             |         |
| 281 | Exchange Flows                             |         |
| 282 | Exchange Flows                             |         |
| 283 | Exchange Flows                             |         |
| 284 | Exchange Flows                             |         |
| 285 | Exchange Flows                             |         |
| 286 | Exchange Flows                             |         |
| 287 | Exchange Flows                             |         |
| 288 | Exchange Flows                             |         |
| 289 | Exchange Flows                             |         |
| 290 | Exchange Flows                             |         |
| 291 | Exchange Flows                             |         |
| 292 | Exchange Flows                             |         |
| 293 | Exchange Flows                             |         |

Allen J (2002) Photosynthesis of ATP-electrons, proton pumps, rotors, and poise. Cell 110:273–6. doi: 10.1016/S0092-8674(02)00777-9

Kanehisa L (2016) KEGG: Kyoto Encyclopedia of Genes and Genomes. <http://www.genome.jp/kegg/>. Accessed 10/10/2016

Nelson DL, Cox MM (2005) Lehninger Principles of Biochemistry, 4th edn. Freeman and Company, New York, NY

Oberhardt M a, Puchałka J, Fryer KE, et al (2008) Genome-scale metabolic network analysis of the opportunistic pathogen *Mycobacterium tuberculosis* H37Rv. PLoS Comput Biol 4:e171. doi: 10.1371/journal.pcbi.1000171

Petkov G, Garcia G (2007) Which are fatty acids of the green alga *Chlorella*? *Biochem Syst Ecol* 35:281–285. d  
Stephanopoulos GN, Aristidou AA, Nielsen J (1998) *Metabolic Engineering: Principles and Methodologies*. Ac  
Yang C, Hua Q, Shimizu K (2000) Energetics and carbon metabolism during growth of microalgal cells under p

## APPEND

| Enzyme                                                     |
|------------------------------------------------------------|
| Photosystem I and II complex                               |
| Not apply                                                  |
| Chloroplast ATPase                                         |
|                                                            |
|                                                            |
| Carbonic acid anhydrase                                    |
| D-ribulose 1,5-diphosphate carboxylase                     |
| Phosphoglycerate kinase                                    |
| Glyceraldehyde-3-phosphate dehydrogenase                   |
|                                                            |
| Triose-phosphate isomerase                                 |
| Fructose-bisphosphate aldolase                             |
| Fructose 1,6-bisphosphatase                                |
| Glucose-6-phosphate isomerase                              |
| Transketolase                                              |
| Fructose-bisphosphate aldolase                             |
| Sedoheptulose-bisphosphatase                               |
| Transketolase                                              |
| Ribulose-phosphate 3-epimerase                             |
| Ribose-5-phosphate isomerase                               |
| Phosphoribulokinase                                        |
|                                                            |
| Hexokinase                                                 |
| Glucose-6-phosphate isomerase                              |
| 6-phosphofructokinase                                      |
| Fructose 1,6-diphosphatase                                 |
| Fructose-bisphosphate aldolase                             |
| Triose-phosphate isomerase                                 |
| Glyceraldehyde-3-phosphate dehydrogenase                   |
| Phosphoglycerate kinase                                    |
| Glyceraldehyde-3-phosphate dehydrogenase (NADP+)           |
| 2,3-diphosphoglycerate-independent phosphoglycerate mutase |
| Enolase                                                    |
| Pyruvate kinase                                            |

[illegible]

|                                                           |
|-----------------------------------------------------------|
|                                                           |
| ATP synthase                                              |
| NADH:nitrate oxidoreductase, ferredoxin-nitrite reductase |
| Glutamate dehydrogenase (NADP+)                           |
| Glutamine synthetase                                      |
| Glutamate synthase (NADPH/NADH)                           |
| Alanine transaminase                                      |
| Aspartate transaminase                                    |
| 3-phosphoglycerate dehydrogenase                          |
| Phosphoserine aminotransferase                            |
| Phosphoserine phosphatase                                 |
|                                                           |
| Homoserine dehydrogenase                                  |
| Homoserine kinase                                         |
| Threonine synthase                                        |
|                                                           |
|                                                           |
| Serine O-acetyltransferase                                |
|                                                           |
| Cysteine synthase                                         |
|                                                           |
|                                                           |
|                                                           |
| Aspartate kinase                                          |
| Aspartate-semialdehyde dehydrogenase                      |
| 4-hydroxy-tetrahydrodipicolinate synthase                 |
| 4-hydroxy-tetrahydrodipicolinate reductase                |
| LL-diaminopimelate aminotransferase                       |
| Diaminopimelate epimerase                                 |
| Diaminopimelate decarboxylase                             |
|                                                           |
|                                                           |
| Anthranilate synthase                                     |
| Anthranilate phosphoribosyltransferase                    |
| Phosphoribosylanthranilate isomerase                      |
| Indole-3-glycerol-phosphate synthase                      |
| Tryptophan synthase                                       |

[illegible]

|                                                            |
|------------------------------------------------------------|
|                                                            |
|                                                            |
|                                                            |
|                                                            |
|                                                            |
| Maltose alpha-D-glucosyltransferase                        |
| Trehalase                                                  |
|                                                            |
| Glucokinase                                                |
| Glucose-6-phosphate isomerase                              |
| Fructose 1,6-diphosphatase                                 |
| Fructose-bisphosphate aldolase                             |
| Triose-phosphate isomerase                                 |
| Glyceraldehyde-3-phosphate dehydrogenase                   |
| Phosphoglycerate kinase                                    |
| Glyceraldehyde-3-phosphate dehydrogenase (NADP+)           |
| 2,3-diphosphoglycerate-independent phosphoglycerate mutase |
| Enolase                                                    |
| Pyruvate kinase                                            |
| Pyruvate dehydrogenase                                     |
| Pyruvate dehydrogenase                                     |
| Pyruvate dehydrogenase                                     |
| Dihydrolipoyl dehydrogenase                                |
| Phosphoenolpyruvate carboxykinase (ATP)                    |
| Pyruvate carboxylase                                       |
| Citrate (Si)-synthase                                      |
| Aconitate hydratase                                        |
| Isocitrate dehydrogenase                                   |
| Isocitrate dehydrogenase                                   |
| 2-oxoglutarate dehydrogenase                               |
| 2-oxoglutarate dehydrogenase                               |
| Dihydrolipoyllysine-residue succinyltransferase            |
| Succinyl-CoA synthetase (ADP-forming)                      |
| Succinate dehydrogenase                                    |



|                                                      |
|------------------------------------------------------|
| Fumarate hydratase                                   |
| Malate dehydrogenase (quinone)                       |
| Isocitrate lyase                                     |
| Malate synthase                                      |
| Malate dehydrogenase                                 |
|                                                      |
| Glucose-6-phosphate-1 dehydrogenase                  |
| 6-phosphogluconolactonase                            |
| Phosphogluconate dehydrogenase                       |
| Ribulose-phosphate 3-epimerase                       |
| Ribose-5-phosphate isomerase                         |
| Transketolase                                        |
| Transaldolase                                        |
| Transketolase                                        |
| Pyrophosphoribosylphosphate synthetase               |
| Transhydrogenase                                     |
| NADH:ubiquinone reductase                            |
| Ubiquinol oxidase (H <sup>+</sup> -transporting)     |
|                                                      |
|                                                      |
| H <sup>+</sup> -transporting two-sector ATPase       |
| Acetate kinase                                       |
|                                                      |
| Alanine dehydrogenase                                |
| Aspartate transaminase                               |
| Asparaginase                                         |
| Glutamine synthetase                                 |
| Aminotransferase                                     |
| Glutamate-5-semialdehyde dehydrogenase               |
| Amino-acid N-acetyltransferase                       |
| Acetylglutamate kinase                               |
| N-acetyl-gamma-glutamyl-phosphate reductase          |
| Acetylmethionine transaminase                        |
| Acetylmethionine deacetylase                         |
| Carbamoyl-phosphate synthase (glutamine-hydrolysing) |
| Methionine carbamoyltransferase                      |
| Argininosuccinate synthase                           |

|                                                                                                   |
|---------------------------------------------------------------------------------------------------|
| Argininosuccinate lyase                                                                           |
| Acetolactate synthase                                                                             |
| Ketol-acid reductoisomerase                                                                       |
| Branched-chain-amino-acid transaminase                                                            |
| 2 isopropylmalate synthase                                                                        |
| 3 isopropylmalate dehydratase                                                                     |
| 3 isopropylmalate dehydrogenase                                                                   |
| Branched-chain-amino-acid transaminase                                                            |
|                                                                                                   |
|                                                                                                   |
|                                                                                                   |
|                                                                                                   |
| Anthranilate synthase                                                                             |
| Anthranilate phosphoribosyltransferase                                                            |
| Phosphoribosylanthranilate isomerase                                                              |
| Tryptophan synthase                                                                               |
| UDP-N-acetylglucosamine 1-carboxyvinyltransferase                                                 |
| Phosphoribosyl-AMP cyclohydrolase                                                                 |
| 1-(5-phosphoribosyl)-5-[(5-phosphoribosylamino)methylideneamino]imidazole-4-carboxamide isomerase |
| Imidazole glycerol phosphate synthase, glutamine amidotransferase subunit with HisF               |
| Glutamine amidotransferase                                                                        |
| Imidazoleglycerol-phosphate dehydratase                                                           |
| Histidinol-phosphate transaminase                                                                 |
| Histidinol dehydrogenase                                                                          |
| Phosphoglycerate dehydrogenase                                                                    |
| Phosphoserine transaminase                                                                        |
| Phosphoserine phosphatase                                                                         |
| Methylenetetrahydrofolate reductase [NAD(P)H]                                                     |
| Glycine hydroxymethyltransferase                                                                  |
|                                                                                                   |
| Sulfate adenylyltransferase                                                                       |
| Adenylyl-sulfate kinase                                                                           |
| Phosphoadenosine phosphosulfate reductase                                                         |
| Uroporphyrinogen-III C-methyltransferase                                                          |
| Sulfite reductase (NADPH)                                                                         |
| O-acetylserine synthase                                                                           |
| Cysteine synthase A                                                                               |

|                                                                                |
|--------------------------------------------------------------------------------|
| Cysteine synthase B                                                            |
| Aspartate kinase                                                               |
| Aspartate-semialdehyde dehydrogenase                                           |
| Homoserine dehydrogenase                                                       |
| Homoserine kinase                                                              |
| Threonine synthase                                                             |
| 4-hydroxy-tetrahydrodipicolinate synthase                                      |
| 4-hydroxy-tetrahydrodipicolinate reductase                                     |
| Succinyldiaminopimelate transaminase                                           |
| 2,3,4,5-tetrahydropyridine-2,6-dicarboxylate N-succinyltransferase             |
| Succinyl-diaminopimelate desuccinylase                                         |
| Diaminopimelate epimerase                                                      |
| homoserine O-succinyltransferase                                               |
| Methionine-gamma-lyase                                                         |
| Cystathionine gamma-lyase                                                      |
| 5-methyltetrahydropteroyltriglutamate--homocysteine methyltransferase          |
| methionine synthase                                                            |
| Diaminopimelate decarboxylase                                                  |
| Amidophosphoribosyltransferase                                                 |
| Phosphoribosylamine---glycine ligase                                           |
| Phosphoribosylglycinamide formyltransferase                                    |
| Phosphoribosylformylglycinamide cyclo-ligase                                   |
| Phosphoribosylformylglycinamide synthase                                       |
| 5-(carboxyamino)imidazole ribonucleotide synthase                              |
| Phosphoribosylaminoimidazole carboxylase                                       |
| Adenylosuccinate synthase                                                      |
| Adenylosuccinate lyase                                                         |
| Phosphoribosylaminoimidazolecarboxamide formyltransferase / IMP cyclohydrolase |
| Phosphoribosylaminoimidazolesuccinocarboxamide synthase                        |
| Adenylate kinase                                                               |
| GMP synthase (glutamine-hydrolysing)                                           |
| IMP dehydrogenase                                                              |
| Guanylate kinase                                                               |
| Aspartate carbamoyltransferase                                                 |
| Dihydroorotase                                                                 |
| Dihydroorotate dehydrogenase                                                   |
| Orotate phosphoribosyltransferase                                              |
| Orotidine-5'-phosphate decarboxylase                                           |
| Uridylate kinase                                                               |
| Nucleoside-diphosphate kinase                                                  |

|                                                             |
|-------------------------------------------------------------|
| Uridine triphosphate aminase                                |
| Cytidylate kinase                                           |
| Ribonucleoside-diphosphate reductase beta chain             |
| Nucleoside-diphosphate kinase                               |
| Ribonucleoside-diphosphate reductase beta chain             |
| Nucleoside-diphosphate kinase                               |
| Ribonucleoside-diphosphate reductase beta chain             |
| Nucleoside-diphosphate kinase                               |
| Ribonucleoside-diphosphate reductase beta chain             |
| Nucleoside-diphosphate kinase                               |
| beta-ketoacyl-[acyl-carrier-protein] synthase I             |
| Phosphomannomutase                                          |
| UTP---glucose-1-phosphate uridylyltransferase               |
| Ethanolamide phosphotransferase                             |
| beta-ketoacyl-[acyl-carrier-protein] synthase I             |
| beta-ketoacyl-[acyl-carrier-protein] synthase I             |
| 3-deoxy-manno-octulosonate cytidylyltransferase             |
|                                                             |
|                                                             |
| Glutamine---fructose-6-phosphate transaminase (isomerizing) |
| 2-dehydro-3-deoxyphosphooctonate aldolase                   |
| glycogen synthase                                           |
| Acetyl-CoA carboxylase                                      |
| [Acyl carrier protein]malonyltransferase                    |
| [Acyl-carrier-protein] S-acetyltransferase                  |
| Beta-ketoacyl-[acyl-carrier-protein] synthase I             |
| Beta-ketoacyl-[acyl-carrier protein](ACP) reductase         |
| 3-hydroxyacyl-[acyl-carrier-protein] dehydratase            |
| Enoyl-[acyl carrier protein] reductase                      |
|                                                             |
|                                                             |
|                                                             |
|                                                             |
|                                                             |
|                                                             |
|                                                             |
|                                                             |
| poly(3-hydroxyalkanoic acid) synthase                       |
|                                                             |



doi: 10.1016/j.bse.2006.10.017

ademic Press, California, USA.

hotoautotrophic, mixotrophic and cyclic light-autotrophic/dark-heterotrophic conditior

## IX A.- METABOLIC NETWORK OF THE CO-CULTURE *Chlorella vulgaris*-*Pseudomonas aeruginosa*

| Biochemical reaction                                                                                                                      |
|-------------------------------------------------------------------------------------------------------------------------------------------|
| $9 \text{ Pho} > 2 \text{ NADPH}_{\text{Cv}} + 1 \text{ O2}_{\text{Cv}} + 12 \text{ H}_{\text{Cv}}$                                       |
| $1 \text{ Pi}_{\text{ext}} > 1 \text{ Pi}_{\text{Cv}}$                                                                                    |
| $14 \text{ H}_{\text{Cv}} + 3 \text{ Pi}_{\text{Cv}} > 3 \text{ ATP}_{\text{Cv}}$                                                         |
| $1 \text{ O2}_{\text{Cv}} > 1 \text{ O2}_{\text{ext}}$                                                                                    |
| $1 \text{ CO2}_{\text{ext}} > 1 \text{ CO2}_{\text{Cv}}$                                                                                  |
| $1 \text{ CO2}_{\text{Cv}} = 1 \text{ HCO3}_{\text{Cv}} + 1 \text{ H}_{\text{Cv}}$                                                        |
| $1 \text{ RuBP}_{\text{c}} + 1 \text{ CO2}_{\text{Cv}} > 2 \text{ PG3}_{\text{c}}$                                                        |
| $1 \text{ ATP}_{\text{Cv}} + 1 \text{ PG3}_{\text{c}} = 1 \text{ PG13}_{\text{c}}$                                                        |
| $1 \text{ PG13}_{\text{c}} + 1 \text{ NADPH}_{\text{Cv}} + 1 \text{ H}_{\text{Cv}} > 1 \text{ G3P}_{\text{c}} + 1 \text{ Pi}_{\text{Cv}}$ |
| $1 \text{ G3P}_{\text{c}} > 1 \text{ G3P}_{\text{Cv}}$                                                                                    |
| $1 \text{ G3P}_{\text{c}} > 1 \text{ DAP}_{\text{c}}$                                                                                     |
| $1 \text{ DAP}_{\text{c}} + 1 \text{ G3P}_{\text{c}} > 1 \text{ FDP}_{\text{c}}$                                                          |
| $1 \text{ FDP}_{\text{c}} > 1 \text{ F6P}_{\text{c}} + 1 \text{ Pi}_{\text{Cv}}$                                                          |
| $1 \text{ F6P}_{\text{c}} = 1 \text{ G6P}_{\text{c}}$                                                                                     |
| $1 \text{ F6P}_{\text{c}} + 1 \text{ G3P}_{\text{c}} > 1 \text{ E4P}_{\text{c}} + 1 \text{ X5P}_{\text{c}}$                               |
| $1 \text{ DAP}_{\text{c}} + 1 \text{ E4P}_{\text{c}} > 1 \text{ S17P}_{\text{c}}$                                                         |
| $1 \text{ S17P}_{\text{c}} > 1 \text{ S7P}_{\text{c}} + 1 \text{ Pi}_{\text{Cv}}$                                                         |
| $1 \text{ S7P}_{\text{c}} + 1 \text{ G3P}_{\text{c}} > 1 \text{ R5P}_{\text{c}} + 1 \text{ X5P}_{\text{c}}$                               |
| $1 \text{ X5P}_{\text{c}} > 1 \text{ RL5P}_{\text{c}}$                                                                                    |
| $1 \text{ R5P}_{\text{c}} > 1 \text{ RL5P}_{\text{c}}$                                                                                    |
| $1 \text{ ATP}_{\text{Cv}} + 1 \text{ RL5P}_{\text{c}} > 1 \text{ RuBP}_{\text{c}}$                                                       |
| $1 \text{ GLC}_{\text{ext}} > 1 \text{ GLC}_{\text{Cv}}$                                                                                  |
| $1 \text{ GLC}_{\text{Cv}} + 1 \text{ ATP}_{\text{Cv}} > 1 \text{ G6P}_{\text{Cv}}$                                                       |
| $1 \text{ G6P}_{\text{Cv}} = 1 \text{ F6P}_{\text{Cv}}$                                                                                   |
| $1 \text{ ATP}_{\text{Cv}} + 1 \text{ F6P}_{\text{Cv}} > 1 \text{ FDP}_{\text{Cv}}$                                                       |
| $1 \text{ FDP}_{\text{Cv}} > 1 \text{ F6P}_{\text{Cv}} + 1 \text{ Pi}_{\text{Cv}}$                                                        |
| $1 \text{ DAP}_{\text{Cv}} + 1 \text{ G3P}_{\text{Cv}} = 1 \text{ FDP}_{\text{Cv}}$                                                       |
| $1 \text{ G3P}_{\text{Cv}} = 1 \text{ DAP}_{\text{Cv}}$                                                                                   |
| $1 \text{ G3P}_{\text{Cv}} + 1 \text{ Pi}_{\text{Cv}} > 1 \text{ PG13}_{\text{Cv}} + 1 \text{ NADH}_{\text{Cv}}$                          |
| $1 \text{ ATP}_{\text{Cv}} + 1 \text{ PG3}_{\text{Cv}} = 1 \text{ PG13}_{\text{Cv}}$                                                      |
| $1 \text{ G3P}_{\text{Cv}} > 1 \text{ PG3}_{\text{Cv}} + 1 \text{ NADPH}_{\text{Cv}} + 1 \text{ H}_{\text{Cv}}$                           |
| $1 \text{ PG3}_{\text{Cv}} = 1 \text{ PG2}_{\text{Cv}}$                                                                                   |
| $1 \text{ PG2}_{\text{Cv}} = 1 \text{ PEP}_{\text{Cv}}$                                                                                   |
| $1 \text{ PEP}_{\text{Cv}} > 1 \text{ ATP}_{\text{Cv}} + 1 \text{ PYR}_{\text{Cv}}$                                                       |

|                                                                                                                                               |
|-----------------------------------------------------------------------------------------------------------------------------------------------|
| 1 PYR_Cv + 1 TPP_Cv > 1 T2hPP_Cv + 1 CO2_Cv                                                                                                   |
| 1 T2hPP_Cv > 1 ACT_Cv + 1 TPP_Cv                                                                                                              |
| 1 ACT_Cv = 1 AC_Cv + 1 NADH_Cv                                                                                                                |
| 1 ATP_Cv + 1 AC_Cv > 1 ACCOA_Cv                                                                                                               |
| 1 ATP_Cv + 1 PYR_Cv + 1 HCO3_Cv > 1 Pi_Cv + 1 OA_Cv                                                                                           |
| 1 ACCOA_Cv + 1 OA_Cv = 1 CIT_Cv                                                                                                               |
| 1 CIT_Cv = 1 ACO_Cv                                                                                                                           |
| 1 ACO_Cv = 1 ICIT_Cv                                                                                                                          |
| 1 ICIT_Cv = 1 AKG_Cv + 1 CO2_Cv + 1 NADH_Cv + 1 H_Cv                                                                                          |
| 1 AKG_Cv + 1 TPP_Cv > 1 T3hPP_Cv + 1 CO2_Cv                                                                                                   |
| 1 T3hPP_Cv + 1 EN6_Cv > 1 SSE_Cv + 1 TPP_Cv                                                                                                   |
| 1 SUCCOA_Cv + 1 EN6d_Cv = 1 SSE_Cv                                                                                                            |
| 1 EN6d_Cv = 1 EN6_Cv + 1 NADH_Cv + 1 H_Cv                                                                                                     |
| 1 Pi_Cv + 1 SUCCOA_Cv = 1 SUC_Cv + 1 ATP_Cv                                                                                                   |
| 1 SUC_Cv = 1 FUM_Cv                                                                                                                           |
| 1 FUM_Cv = 1 MAL_Cv                                                                                                                           |
| 1 MAL_Cv = 1 OA_Cv + 1 NADH_Cv + 1 H_Cv                                                                                                       |
| 1 ATP_Cv + 1 OA_Cv > 1 PEP_Cv + 1 CO2_Cv                                                                                                      |
| 1 G6P_Cv > 1 G15L6P_Cv + 1 NADPH_Cv + 1 H_Cv                                                                                                  |
| 1 G15L6P_Cv > 1 GL6P_Cv                                                                                                                       |
| 1 GL6P_Cv > 1 RL5P_Cv + 1 CO2_Cv + 1 NADPH_Cv + 1 H_Cv                                                                                        |
| 1 R5P_Cv = 1 RL5P_Cv                                                                                                                          |
| 1 X5P_Cv = 1 RL5P_Cv                                                                                                                          |
| 1 F6P_Cv + 1 G3P_Cv = 1 E4P_Cv + 1 X5P_Cv                                                                                                     |
| 1 S7P_Cv + 1 G3P_Cv = 1 R5P_Cv + 1 X5P_Cv                                                                                                     |
| 1 S7P_Cv + 1 G3P_Cv = 1 E4P_Cv + 1 F6P_Cv                                                                                                     |
| 1 ATP_Cv + 1 R5P_Cv = 1 PRPP_Cv                                                                                                               |
| 7 ACCOA_Cv + 6 ATP_Cv + 6 HCO3_Cv + 12 NADPH_Cv > 6 Pi_Cv + 6 CO2_Cv + 1 C14:0CoA                                                             |
| 8 ACCOA_Cv + 7 ATP_Cv + 7 HCO3_Cv + 14 NADPH_Cv > 7 Pi_Cv + 7 CO2_Cv + 1 C16:0CoA                                                             |
| 8 ACCOA_Cv + 7 ATP_Cv + 7 HCO3_Cv + 15 NADPH_Cv + 1 O2_Cv > 7 Pi_Cv + 7 CO2_Cv + 1 C16:1CoA                                                   |
| 8 ACCOA_Cv + 7 ATP_Cv + 7 HCO3_Cv + 16 NADPH_Cv + 2 O2_Cv > 7 Pi_Cv + 7 CO2_Cv + 1 C16:2CoA                                                   |
| 8 ACCOA_Cv + 7 ATP_Cv + 7 HCO3_Cv + 17 NADPH_Cv + 3 O2_Cv > 7 Pi_Cv + 7 CO2_Cv + 1 C16:3CoA                                                   |
| 9 ACCOA_Cv + 8 ATP_Cv + 8 HCO3_Cv + 16 NADPH_Cv > 8 Pi_Cv + 8 CO2_Cv + 1 C18:0CoA                                                             |
| 9 ACCOA_Cv + 8 ATP_Cv + 8 HCO3_Cv + 17 NADPH_Cv + 1 O2_Cv > 8 Pi_Cv + 8 CO2_Cv + 1 C18:1CoA                                                   |
| 9 ACCOA_Cv + 8 ATP_Cv + 8 HCO3_Cv + 18 NADPH_Cv + 2 O2_Cv > 8 Pi_Cv + 8 CO2_Cv + 1 C18:2CoA                                                   |
| 9 ACCOA_Cv + 8 ATP_Cv + 8 HCO3_Cv + 19 NADPH_Cv + 3 O2_Cv > 8 Pi_Cv + 8 CO2_Cv + 1 C18:3CoA                                                   |
| 6 C14:0CoA + 250 C16:0CoA + 20 C16:1CoA + 100 C16:2CoA + 20 C16:3CoA + 4 C18:0CoA + 160 C18:1CoA + 240 C18:2CoA + 200 C18:3CoA > 1000 AcylCoA |
| 2 NADH_Cv + 1 PG3_Cv + 3 AcylCoA > 1 Pi_Cv + 1 TAG_Cv                                                                                         |



$2 \text{ NADH}_{\text{Cv}} + 1 \text{ O2}_{\text{Cv}} > 20 \text{ H}_{\text{m}}$   
 $1 \text{ Pi}_{\text{Cv}} + 3 \text{ H}_{\text{m}} > 1 \text{ ATP}_{\text{Cv}}$   
 $1 \text{ NO3ext} + 1 \text{ NADH}_{\text{Cv}} + 3 \text{ NADPH}_{\text{Cv}} + 5 \text{ H}_{\text{Cv}} > 1 \text{ NH3}_{\text{Cv}}$   
 $1 \text{ AKG}_{\text{Cv}} + 1 \text{ NH3}_{\text{Cv}} + 1 \text{ NADPH}_{\text{Cv}} + 1 \text{ H}_{\text{Cv}} = 1 \text{ Glu}_{\text{Cv}}$   
 $1 \text{ ATP}_{\text{Cv}} + 1 \text{ Glu}_{\text{Cv}} + 1 \text{ NH3}_{\text{Cv}} > 1 \text{ Pi}_{\text{Cv}} + 1 \text{ Gln}_{\text{Cv}}$   
 $1 \text{ Gln}_{\text{Cv}} + 1 \text{ AKG}_{\text{Cv}} + 1 \text{ NADH}_{\text{Cv}} + 1 \text{ H}_{\text{Cv}} > 2 \text{ Glu}_{\text{Cv}}$   
 $1 \text{ Ala}_{\text{Cv}} + 1 \text{ AKG}_{\text{Cv}} = 1 \text{ PYR}_{\text{Cv}} + 1 \text{ Glu}_{\text{Cv}}$   
 $1 \text{ Asp}_{\text{Cv}} + 1 \text{ AKG}_{\text{Cv}} = 1 \text{ OA}_{\text{Cv}} + 1 \text{ Glu}_{\text{Cv}}$   
 $1 \text{ PG3}_{\text{Cv}} = 1 \text{ PP3}_{\text{Cv}} + 1 \text{ NADH}_{\text{Cv}}$   
 $1 \text{ Pser}_{\text{Cv}} + 1 \text{ AKG}_{\text{Cv}} = 1 \text{ PP3}_{\text{Cv}} + 1 \text{ Glu}_{\text{Cv}}$   
 $1 \text{ Pser}_{\text{Cv}} > 1 \text{ Ser}_{\text{Cv}} + 1 \text{ Pi}_{\text{Cv}}$   
 $1 \text{ PG3}_{\text{Cv}} + 1 \text{ NH3}_{\text{Cv}} + 1 \text{ NADPH}_{\text{Cv}} > 1 \text{ NADH}_{\text{Cv}} + 1 \text{ Pi}_{\text{Cv}} + 1 \text{ Gly}_{\text{Cv}}$   
 $1 \text{ Hser}_{\text{Cv}} = 1 \text{ ASPSALD}_{\text{Cv}} + 1 \text{ NADH}_{\text{Cv}} + 1 \text{ H}_{\text{Cv}}$   
 $1 \text{ Hser}_{\text{Cv}} + 1 \text{ ATP}_{\text{Cv}} > 1 \text{ PHser}_{\text{Cv}}$   
 $1 \text{ PHser}_{\text{Cv}} > 1 \text{ Thr}_{\text{Cv}} + 1 \text{ Pi}_{\text{Cv}}$   
 $1 \text{ AKG}_{\text{Cv}} + 1 \text{ NH3}_{\text{Cv}} + 1 \text{ ATP}_{\text{Cv}} + 3 \text{ NADPH}_{\text{Cv}} > 1 \text{ Pi}_{\text{Cv}} + 1 \text{ Prol}_{\text{Cv}}$   
 $1 \text{ AKG}_{\text{Cv}} + 7 \text{ ATP}_{\text{Cv}} + 4 \text{ NADPH}_{\text{Cv}} + 4 \text{ NH3}_{\text{Cv}} > 1 \text{ NADH}_{\text{Cv}} + 7 \text{ Pi}_{\text{Cv}} + 1 \text{ Arg}_{\text{Cv}}$   
 $1 \text{ Ser}_{\text{Cv}} + 1 \text{ ACCOA}_{\text{Cv}} > 1 \text{ Aser}_{\text{Cv}}$   
 $1 \text{ SO4ext} > 1 \text{ SO4}_{\text{Cv}}$   
 $1 \text{ Aser}_{\text{Cv}} + 1 \text{ SO4}_{\text{Cv}} > 1 \text{ Cys}_{\text{Cv}} + 1 \text{ AC}_{\text{Cv}}$   
 $1 \text{ R5P}_{\text{Cv}} + 6 \text{ ATP}_{\text{Cv}} + 1 \text{ NADPH}_{\text{Cv}} + 3 \text{ NH3}_{\text{Cv}} > 6 \text{ Pi}_{\text{Cv}} + 3 \text{ NADH}_{\text{Cv}} + 1 \text{ His}_{\text{Cv}}$   
 $1 \text{ OA}_{\text{Cv}} + 1 \text{ PYR}_{\text{Cv}} + 2 \text{ ATP}_{\text{Cv}} + 5 \text{ NADPH}_{\text{Cv}} + 1 \text{ NH3}_{\text{Cv}} > 2 \text{ Pi}_{\text{Cv}} + 1 \text{ Iso}_{\text{Cv}}$   
 $2 \text{ PYR}_{\text{Cv}} + 1 \text{ ACCOA}_{\text{Cv}} + 2 \text{ NADPH}_{\text{Cv}} + 1 \text{ NH3}_{\text{Cv}} > 1 \text{ NADH}_{\text{Cv}} + 1 \text{ Leu}_{\text{Cv}}$   
 $1 \text{ ATP}_{\text{Cv}} + 1 \text{ Asp}_{\text{Cv}} > 1 \text{ Pasp}_{\text{Cv}}$   
 $1 \text{ Pasp}_{\text{Cv}} + 1 \text{ NADPH}_{\text{Cv}} + 1 \text{ H}_{\text{Cv}} > 1 \text{ ASPSALD}_{\text{Cv}} + 1 \text{ Pi}_{\text{Cv}}$   
 $1 \text{ Asp}_{\text{Cv}} + 1 \text{ PYR}_{\text{Cv}} > 1 \text{ sHTHP}_{\text{Cv}}$   
 $1 \text{ sHTHP}_{\text{Cv}} + 1 \text{ NADH}_{\text{Cv}} + 1 \text{ H}_{\text{Cv}} > 1 \text{ HTHP}_{\text{Cv}}$   
 $1 \text{ HTHP}_{\text{Cv}} + 1 \text{ Glu}_{\text{Cv}} > 1 \text{ DIAMPIM}_{\text{Cv}} + 1 \text{ AKG}_{\text{Cv}}$   
 $1 \text{ DIAMPIM}_{\text{Cv}} > 1 \text{ MDIAMPIM}_{\text{Cv}}$   
 $1 \text{ MDIAMPIM}_{\text{Cv}} > 1 \text{ Lys}_{\text{Cv}} + 1 \text{ CO2}_{\text{Cv}}$   
 $1 \text{ OA}_{\text{Cv}} + 7 \text{ ATP}_{\text{Cv}} + 8 \text{ NADPH}_{\text{Cv}} + 1 \text{ NH3}_{\text{Cv}} + 1 \text{ SO4}_{\text{Cv}} > 7 \text{ Pi}_{\text{Cv}} + 1 \text{ Met}_{\text{Cv}}$   
 $2 \text{ PEP}_{\text{Cv}} + 1 \text{ E4P}_{\text{Cv}} + 1 \text{ ATP}_{\text{Cv}} + 2 \text{ NADPH}_{\text{Cv}} + 1 \text{ NH3}_{\text{Cv}} > 1 \text{ Pi}_{\text{Cv}} + 1 \text{ Phe}_{\text{Cv}}$   
 $1 \text{ CHOR}_{\text{Cv}} + 1 \text{ NH3}_{\text{Cv}} > 1 \text{ VL1}_{\text{Cv}} + 1 \text{ PYR}_{\text{Cv}}$   
 $1 \text{ VL1}_{\text{Cv}} + 1 \text{ PRPP}_{\text{Cv}} > 1 \text{ VL15P}_{\text{Cv}}$   
 $1 \text{ VL15P}_{\text{Cv}} > 1 \text{ CD5P}_{\text{Cv}}$   
 $1 \text{ CD5P}_{\text{Cv}} > 1 \text{ I3GP}_{\text{Cv}} + 1 \text{ CO2}_{\text{Cv}}$   
 $1 \text{ Ser}_{\text{Cv}} + 1 \text{ I3GP}_{\text{Cv}} > 1 \text{ Trp}_{\text{Cv}} + 1 \text{ G3P}_{\text{Cv}}$

---

1 PEP\_Cv + 1 E4P\_Cv > 1 DAHP\_Cv + 1 Pi\_Cv

1 DAHP\_Cv > 1 DHQ\_Cv + 1 Pi\_Cv

1 DHQ\_Cv > 1 DHSK\_Cv

1 DHSK\_Cv + 1 NADPH\_Cv + 1 H\_Cv > 1 Shi\_Cv

1 ATP\_Cv + 1 Shi\_Cv > 1 Shi3P\_Cv

1 PEP\_Cv + 1 Shi3P\_Cv > 1 Pi\_Cv + 1 Shi35P\_Cv

1 Shi35P\_Cv > 1 CHOR\_Cv + 1 Pi\_Cv

1 CHOR\_Cv > 1 PRE\_Cv

1 PRE\_Cv + 1 Asp\_Cv > 1 OA\_Cv + 1 ARO\_Cv

1 ARO\_Cv > 1 Tyr\_Cv + 1 CO2\_Cv + 1 NADPH\_Cv + 1 H\_Cv

2 PYR\_Cv + 2 NADPH\_Cv + 1 NH3\_Cv > 1 Val\_Cv

1 PG3\_Cv + 1 R5P\_Cv + 9 ATP\_Cv + 1 NADPH\_Cv + 5 NH3\_Cv > 9 Pi\_Cv + 3 NADH\_Cv + 1 AMP\_Cv

1 PG3\_Cv + 1 R5P\_Cv + 11 ATP\_Cv + 5 NH3\_Cv > 11 Pi\_Cv + 3 NADH\_Cv + 1 GMP\_Cv

1 OA\_Cv + 1 R5P\_Cv + 5 ATP\_Cv + 1 NADPH\_Cv + 2 NH3\_Cv > 5 Pi\_Cv + 1 UMP\_Cv

1 OA\_Cv + 1 R5P\_Cv + 7 ATP\_Cv + 1 NADPH\_Cv + 3 NH3\_Cv > 5 Pi\_Cv + 1 CMP\_Cv

1 PG3\_Cv + 1 R5P\_Cv + 9 ATP\_Cv + 2 NADPH\_Cv + 5 NH3\_Cv > 9 Pi\_Cv + 3 NADH\_Cv + 1 dAMP\_Cv

1 PG3\_Cv + 1 R5P\_Cv + 11 ATP\_Cv + 1 NADPH\_Cv + 5 NH3\_Cv > 11 Pi\_Cv + 3 NADH\_Cv + 1 dGMP\_Cv

1 OA\_Cv + 1 R5P\_Cv + 5 ATP\_Cv + 3 NADPH\_Cv + 2 NH3\_Cv > 5 Pi\_Cv + 1 dTMP\_Cv

1 OA\_Cv + 1 R5P\_Cv + 7 ATP\_Cv + 2 NADPH\_Cv + 3 NH3\_Cv > 7 Pi\_Cv + 1 dCMP\_Cv

1 G6P\_Cv + 1 ATP\_Cv > 1 Pi\_Cv + 1 UDPGLC\_Cv

1 G6P\_Cv + 1 ATP\_Cv > 1 Pi\_Cv + 1 UDPGAL\_Cv

1 F6P\_Cv + 1 ACCoA\_Cv + 2 ATP\_Cv + 1 NH3\_Cv > 2 Pi\_Cv + 1 UDPNAG\_Cv

1 DAP\_Cv + 2 AcylCoA + 1 NADH\_Cv + 2 ATP\_Cv + 1 Ser\_Cv > 1 CO2\_Cv + 1 PE\_Cv

1 DAP\_Cv + 1 PG3\_Cv + 1 NADPH\_Cv + 2 ATP\_Cv + 1 NH3\_Cv + 2 AcylCoA > 1 PC\_Cv

2 DAP\_Cv + 2 NADH\_Cv + 2 AcylCoA + 2 ATP\_Cv > 1 Pi\_Cv + 1 PG\_Cv

4 PYR\_Cv + 4 G3P\_Cv + 14 ATP\_Cv + 29 NADPH\_Cv + 8 Glu\_Cv + 7 O2\_Cv + 1 Mg > 10 CO2\_Cv + 4 NH3\_Cv + 20 Pi\_Cv + 1 Chla

4 PYR\_Cv + 4 G3P\_Cv + 14 ATP\_Cv + 31 NADPH\_Cv + 8 Glu\_Cv + 9 O2\_Cv + 1 Mg > 10 CO2\_Cv + 4 NH3\_Cv + 20 Pi\_Cv + 1 Chlb

10 G6P\_c + 20 ATP\_Cv > 3 ALMI\_c

1 ALMI\_c > 200 MALT\_Cv

1 MALT\_Cv > 1 MALText

0.79 AMP\_Cv + 0.81 UMP\_Cv + 0.89 GMP\_Cv + 0.61 CMP\_Cv + 7.44 ATP\_Cv > 7.44 Pi\_Cv + 1 RNA\_Cv

0.79 dAMP\_Cv + 0.79 dTMP\_Cv + 0.82 dGMP\_Cv + 0.82 dCMP\_Cv + 11 ATP\_Cv > 11 Pi\_Cv + 1 DNA\_Cv

0.612 UDPGLC\_Cv + 0.102 UDPGAL\_Cv + 0.286 UDPNAG\_Cv > 0.578 CARBH

0.63 TAG\_Cv + 0.048 PG\_Cv + 0.204 PC\_Cv + 0.118 PE\_Cv > 0.884 LIPID

---

---

0.765 Prol\_Cv + 0.126 Trp\_Cv + 0.588 Asp\_Cv + 0.648 Glu\_Cv + 0.384 Ser\_Cv + 0.298 Thr\_Cv + 1.01 Gly\_Cv + 1.057 Ala\_Cv + 0.574 Val\_Cv + 0.569 Leu\_Cv + 0.326 Isc Phe\_Cv + 0.189 Tyr\_Cv + 0.765 Met\_Cv + 0.02 Cys\_Cv + 1.109 Arg\_Cv + 0.26 His\_Cv + 0.854 Lys\_Cv + 39.1 ATP\_Cv > 1.164 PRO\_Cv + 39.1 Pi\_Cv

---

2.5 Chla + 1 Chlb > 3.136 CHL

---

1 PO4ext > 1 PO4\_Cv

---

95 ATP\_Cv + 0.01131 K + 0.00531 Mg + 0.04214 PO4\_Cv + 0.00916 SO4\_Cv + 0.0027 Fe + 0.00039 Ca + 0.00003 Zn + 0.00002 Cu + 0.00006 Mn + 0.00275 DNA\_Cv + 0 RNA\_Cv + 0.15572 CARBH + 0.20152 LIPID + 0.53128 PRO\_Cv + 0.01374 CHL > 1 BIO\_Cv + 95 Pi\_Cv

---

1 MALText > 1 MALT\_P

---

1 MALT\_P > 1 T\_P

---

1 T\_P > 2 GLC\_P

---

1 GLCext > 1 GLC\_P

---

1 GLC\_P + 1 ATP\_P > 1 G6P\_P

---

1 G6P\_P = 1 F6P\_P

---

1 FDP\_P > 1 F6P\_P + 1 Pi\_P

---

1 FDP\_P = 1 G3P\_P + 1 DAP\_P

---

1 DAP\_P = 1 G3P\_P

---

1 G3P\_P + 1 Pi\_P = 1 PG13\_P + 1 NADH\_P + 1 H\_P

---

1 ATP\_P + 1 PG3\_P = 1 PG13\_P

---

1 G3P\_P > 1 PG3\_P + 1 NADPH\_P + 1 H\_P

---

1 PG3\_P = 1 PG2\_P

---

1 PG2\_P = 1 PEP\_P

---

1 PEP\_P > 1 ATP\_P + 1 PYR\_P

---

1 PYR\_P + 1 TPP\_P > 1 T2hPP\_P + 1 CO2\_P

---

1 T2hPP\_P + 1 EN6\_P > 1 EN6s + 1 TPP\_P

---

1 EN6s = 1 EN6\_P + 1 ACCOA\_P

---

1 EN6d\_P = 1 EN6\_P + 1 NADH\_P + 1 H\_P

---

1 ATP\_P + 1 OA\_P > 1 PEP\_P + 1 CO2\_P

---

1 ATP\_P + 1 PYR\_P + 1 CO2\_P > 1 OA\_P + 1 Pi\_P

---

1 ACCOA\_P + 1 OA\_P > 1 CIT\_P

---

1 CIT\_P = 1 ICIT\_P

---

1 ICIT\_P = 1 OAS\_P + 1 NADPH\_P

---

1 OAS\_P = 1 AKG\_P + 1 CO2\_P

---

1 AKG\_P + 1 TPP\_P > 1 T3hPP\_P + 1 CO2\_P

---

1 T3hPP\_P + 1 EN6\_P > 1 SSE\_P + 1 TPP\_P

---

1 SUCCOA\_P + 1 EN6d\_P = 1 SSE\_P

---

1 Pi\_P + 1 SUCCOA\_P = 1 ATP\_P + 1 SUC\_P

---

1 SUC\_P = 1 QH\_P + 1 FUM\_P

---

|                                                  |
|--------------------------------------------------|
| 1 FUM_P = 1 MAL_P                                |
| 1 MAL_P = 1 QH_P + 1 OA_P                        |
| 1 ICIT_P > 1 GLYOx + 1 SUC_P                     |
| 1 GLYOx + 1 ACCOA_P > 1 MAL_P                    |
| 1 MAL_P = 1 PYR_P + 1 CO2_P + 1 NADH_P           |
| 1 CO2_P = 1 CO2ext                               |
| 1 G6P_P > 1 G15L6P_P + 1 NADPH_P + 1 H_P         |
| 1 G15L6P_P > 1 GL6P_P                            |
| 1 GL6P_P > 1 CO2_P + 1 NADPH_P + 1 RL5P_P        |
| 1 RL5P_P = 1 X5P_P                               |
| 1 RL5P_P = 1 R5P_P                               |
| 1 F6P_P + 1 G3P_P = 1 X5P_P + 1 E4P_P            |
| 1 G3P_P + 1 S7P_P = 1 F6P_P + 1 E4P_P            |
| 1 R5P_P + 1 X5P_P = 1 G3P_P + 1 S7P_P            |
| 1 ATP_P + 1 R5P_P = 1 PRPP                       |
| 1 NADPH_P = 1 NADH_P                             |
| 1 NADH_P > 1 QH2_P + 2 H_P                       |
| 1 QH2_P + 0.5 O2_P > 2 H_P                       |
| 1 O2ext > 1 O2_P                                 |
| 1 Piext > 1 Pi_P                                 |
| 1 Pi_P + 4 H_P > 1 ATP_P                         |
| 1 Pi_P + 1 ACCOA_P = 1 ATP_P + 1 AC              |
| 1 NH3ext > 1 NH3_P                               |
| 1 NADPH_P + 1 AKG_P + 1 NH3_P > 1 Glu_P          |
| 1 OA_P + 1 Glu_P = 1 AKG_P + 1 Asp_P             |
| 1 ATP_P + 1 Asp_P + 1 NH3_P > 1 Asn_P            |
| 1 ATP_P + 1 Glu_P + 1 NH3_P > 1 Pi_P + 1 Gln_P   |
| 1 PYR_P + 1 Glu_P = 1 AKG_P + 1 Ala_P            |
| 1 ATP_P + 2 NADPH_P + 1 Glu_P > 1 Pi_P + 1 Pro_P |

|                                                                                                                       |
|-----------------------------------------------------------------------------------------------------------------------|
| 4 ATP_P + 1 ACCOA_P + 1 CO2_P + 1 NADPH_P + 1 Asp_P + 2 Glu_P + 1 NH3_P > 4 Pi_P + 1 AKG_P + 1 FUM_P + 1 AC + 1 Arg_P |
|-----------------------------------------------------------------------------------------------------------------------|

2 PYR\_P > 1 ACLAC\_P + 1 CO2\_P

1 ACLAC\_P = 1 OXOB\_P

1 Val\_P + 1 AKG\_P = 1 OXOB\_P + 1 Glu\_P

1 OXOB\_P + 1 ACCOA\_P > 1 AIM\_P

1 AIM\_P > 1 A3IM\_P

1 A3IM\_P > 1 M2OX\_P + 1 CO2\_P + 1 NADH\_P + 1 H\_P

1 Leu\_P + 1 AKG\_P = 1 M2OX\_P + 1 Glu\_P

1 PYR\_P + 1 NADPH\_P + 1 Glu\_P + 1 Thr\_P > 1 CO2\_P + 1 AKG\_P + 1 NH3\_P + 1 Iso\_P

1 ATP\_P + 2 PEP\_P + 1 NADPH\_P + 1 E4P\_P > 4 Pi\_P + 1 CHOR

1 Glu\_P + 1 CHOR > 1 CO2\_P + 1 AKG\_P + 1 Phe\_P

1 Glu\_P + 1 CHOR > 1 CO2\_P + 1 NADPH\_P + 1 AKG\_P + 1 Tyr\_P

1 Gln\_P + 1 CHOR + 1 Ser\_P + 1 PRPP > 1 G3P\_P + 1 PYR\_P + 1 CO2\_P + 1 Glu\_P + 1 Trp\_P

1 ATP\_P + 1 Gln\_P + 1 PRPP > 2 NADH\_P + 1 AKG\_P + 1 His\_P

1 PG3\_P + 1 Glu\_P > 1 Pi\_P + 1 NADH\_P + 1 AKG\_P + 1 Ser\_P

1 ATP\_P + 1 NADPH\_P = 1 Pi\_P + 1 MTHF

1 Ser\_P = 1 MTHF + 1 Gly\_P

1 SO4ext > 1 SO4\_P

2 ATP\_P + 4 NADPH\_P + 1 SO4\_P > 1 S\_P

1 ACCOA\_P + 1 Ser\_P + 1 S\_P > 1 AC + 1 Cys\_P

1 ATP\_P + 1 NADPH\_P + 1 Asp\_P > 1 Pi\_P + 1 ASPSALD

1 NADPH\_P + 1 ASPSALD > 1 Hser\_P

1 ATP\_P + 1 Hser\_P > 1 Thr\_P

1 PYR\_P + 1 NADPH\_P + 1 SUCCOA\_P + 1 Glu\_P + 1 ASPSALD > 1 AKG\_P + 1 SUC\_P + 1 DIAMPIM

1 SUCCOA\_P + 1 MTHF + 1 Cys\_P + 1 Hser\_P > 1 PYR\_P + 1 SUC\_P + 1 NH3\_P + 1 Met\_P

1 DIAMPIM > 1 CO2\_P + 1 Lys\_P

5 ATP\_P + 1 CO2\_P + 1 Asp\_P + 2 Gln\_P + 1 PRPP + 2 MTHF + 1 Gly\_P > 5 Pi\_P + 1 NADPH\_P + 2 FUM\_P + 2 Glu\_P + 1 RATP

6 ATP\_P + 1 CO2\_P + 1 Asp\_P + 3 Gln\_P + 1 PRPP + 2 MTHF + 1 Gly\_P > 6 Pi\_P + 1 NADH\_P + 1 NADPH\_P + 2 FUM\_P + 3 Glu\_P + 1 RGTP

4 ATP\_P + 1 Asp\_P + 1 NH3\_P + 1 PRPP > 1 NADH\_P + 1 RUTP

|                                                                        |
|------------------------------------------------------------------------|
| 1 ATP_P + 1 Gln_P + 1 RUTP > 1 Pi_P + 1 Glu_P + 1 RCTP                 |
| 1 NADPH_P + 1 RATP > 1 dATP                                            |
| 1 NADPH_P + 1 RGTP > 1 dGTP                                            |
| 1 NADPH_P + 1 RCTP > 1 dCTP                                            |
| 2 NADPH_P + 1 MTHF + 1 RUTP > 1 dTTP                                   |
| 7.24 ATP_P + 8.2 ACCOA_P + 13.91 NADPH_P > 7.24 Pi_P + 1 MITFS         |
| 1 ATP_P + 1 G6P_P > 1 Pi_P + 1 UDPGLC                                  |
| 3 ATP_P + 1 PG3_P + 1 NADPH_P + 1 NH3_P > 3 Pi_P + 1 NADH_P + 1 CDPETH |
| 6 ATP_P + 7 ACCOA_P + 11 NADPH_P > 6 Pi_P + 1 OHMYRAC                  |
| 6 ATP_P + 7 ACCOA_P + 12 NADPH_P > 6 Pi_P + 1 C14OFS                   |
| 2 ATP_P + 1 PEP_P + 1 R5P_P > 2 Pi_P + 1 CMPKDO                        |
| 1 ATP_P + 1.5 G6P_P > 1 Pi_P + 4 NADPH_P + 1 NDPHEP                    |
| 2 ATP_P + 1 F6P_P + 1 NH3_P > 2 Pi_P + 1 TDPGLCS                       |
| 1 ATP_P + 1 F6P_P + 1 ACCOA_P + 1 Gln_P > 1 Glu_P + 1 UDPNAG_P         |
| 1 PEP_P + 1 NADPH_P + 1 UDPNAG_P > 1 UDPNAM_P                          |
| 1 ATP_P + 1 G6P_P > 1 Pi_P + 1 ADPGLC_P                                |
| 1 ATP_P + 1 ACCOA_P + 1 CO2_P > 1 Pi_P + 1 MALCOA                      |
| 1 MALCOA = 1 MALACP                                                    |
| 1 ACCOA_P = 1 ACACP                                                    |
| 1 MALACP + 1 ACACP > 1 ACACCOAACP                                      |
| 1 NADPH_P + 1 ACACCOAACP > 1 D3HBACP                                   |
| 1 NADPH_P + 1 D3HBACP > 1 BACP                                         |
| 1 NADPH_P + 1 MALACP + 1 BACP > 1 CO2_P + 1 D3HHXACP                   |
| 1 NADPH_P + 1 D3HHXACP > 1 HHXACP                                      |
| 1 NADPH_P + 1 MALACP + 1 HHXACP > 1 CO2_P + 1 D3HOACP                  |
| 1 NADPH_P + 1 D3HOACP > 1 OACP                                         |
| 1 NADPH_P + 1 MALACP + 1 OACP > 1 CO2_P + 1 D3HDACP                    |
| 1 NADPH_P + 1 D3HDACP > 1 DACP                                         |
| 1 NADPH_P + 1 MALACP + 1 DACP > 1 CO2_P + 1 D3HDODACP                  |
| 1 D3HOACP > 1 D3HOCOA                                                  |
| 1 D3HOCOA > 1 PHO                                                      |
| 1 D3HDACP > 1 D3HDCOA                                                  |

---

1 D3HDCOA > 1 PHD

---

1D3HDODACP > 1 D3HDODCOA

---

1 D3HDODCOA > 1 PHDOD

---

1 PHO + 1 PHD + 1 PHDOD > 1 PHAs

---

1 PHAs > 1 PHAs<sub>ext</sub>

---

23.9827 ATP\_P + 0.14176 G3P\_P + 0.24149 Asp\_P + 0.29124 Glu\_P + 0.24149 Asn\_P + 0.26364 Gln\_P + 0.56982 Ala\_P + 0.22146 Pro\_P + 0.29633 Arg\_P + 0.45134 Leu\_Val\_P + 0.29106 Iso\_P + 0.25414 Thr\_P + 0.1856 Phe\_P + 0.13814 Tyr\_P + 0.056944 Trp\_P + 0.35794 Ser\_P + 0.094911 His\_P + 0.61376 Gly\_P + 0.091744 Cys\_P + 0.027 + 0.34378 Lys\_P + 0.15397 Met\_P + 0.203 RGTP + 0.136 RUTP + 0.12594 RCTP + 0.165 RATP + 0.024701 dATP + 0.025401 dGTP + 0.025401 dCTP + 0.024701 dTTP + MITFS + 0.0157 UDPGLC + 0.0235 CDPETH + 0.0235 OHMYRAC + 0.0235 C14OFS + 0.0235 CMPKDO + 0.0235 NDPHEP + 0.0157 TDPGLCS + 0.0276 UDPNAG\_P + UDPNAM\_P + 0.154 ADPGLC\_P > 1 BIO\_P + 23.98 Pi\_P

---

> 1 Pho

---

> 1 Pi<sub>ext</sub>

---

> 1 K

---

> 1 Mg

---

> 1 PO<sub>4</sub><sub>ext</sub>

---

> 1 SO<sub>4</sub><sub>ext</sub>

---

> 1 Fe

---

> 1 Ca

---

> 1 Zn

---

> 1 Cu

---

> 1 Mn

---

> 1 BIO\_Cv

---

> 1 GLC<sub>ext</sub>

---

> 1 NO<sub>3</sub><sub>ext</sub>

---

> 1 BIO\_P

---

> 1 PHAs<sub>ext</sub>

---

> 1 NH<sub>3</sub><sub>ext</sub>

---

> 1 CO<sub>2</sub><sub>ext</sub>

---

> 1 O<sub>2</sub><sub>ext</sub>

---

> 1 MAL<sub>Text</sub>

---

3.01583-07



rs. Biochem Eng J 6:87–102. doi: 10.1016/S1369-703X(00)00080-2

[illegible]

[illegible]

|                                      |
|--------------------------------------|
| (Nelson and Cox, 2005)               |
| (Kanehisa, 2017)                     |
| (Yang, et al. 2000, Kanehisa, 2017)  |
| (Kanehisa, 2017)                     |
| (Kanehisa, 2017)                     |
| (Kanehisa, 2017)                     |
| (Kanehisa, 2017)                     |
| (Kanehisa, 2017)                     |
| (Kanehisa, 2017)                     |
| (Kanehisa, 2017)                     |
| (Kanehisa, 2017)                     |
| (Stephanopoulos <i>et al.</i> ,1998) |
| (Kanehisa, 2017)                     |
| (Kanehisa, 2017)                     |
| (Kanehisa, 2017)                     |
| (Stephanopoulos <i>et al.</i> ,1998) |
| (Stephanopoulos <i>et al.</i> ,1998) |
| (Kanehisa, 2017)                     |
|                                      |
| (Kanehisa, 2017)                     |
| (Stephanopoulos <i>et al.</i> ,1998) |
| (Stephanopoulos <i>et al.</i> ,1998) |
| (Stephanopoulos <i>et al.</i> ,1998) |
| (Kanehisa, 2017)                     |
| (Stephanopoulos <i>et al.</i> ,1998) |
| (Stephanopoulos <i>et al.</i> ,1998) |
| (Kanehisa, 2017)                     |

|                                                                                                                                                                                                                                                                                                                                     |
|-------------------------------------------------------------------------------------------------------------------------------------------------------------------------------------------------------------------------------------------------------------------------------------------------------------------------------------|
| (Kanehisa, 2017)                                                                                                                                                                                                                                                                                                                    |
| (Stephanopoulos <i>et al.</i> , 1998)                                                                                                                                                                                                                                                                                               |
| Sum of total reactions in Kanehisa, 2017.                                                                                                                                                                                                                                                                                           |
| Sum of total reactions in Kanehisa, 2017.                                                                                                                                                                                                                                                                                           |
| (Yang, et al. 2000)                                                                                                                                                                                                                                                                                                                 |
| Polysaccharides have no defined molecular mass, but are composed of at least 200 disaccharide residues (Nelson and Cox, 2005)                                                                                                                                                                                                       |
|                                                                                                                                                                                                                                                                                                                                     |
| mm RNA of 323 g/mol (Stephanopoulos <i>et al.</i> , 1998)                                                                                                                                                                                                                                                                           |
| mm DNA of 310 g/mol (Stephanopoulos <i>et al.</i> , 1998)                                                                                                                                                                                                                                                                           |
| mm de CARBH de 577.77 (Brown <i>et al.</i> , 1997). Sialve <i>et al.</i> , takes a value of MM of (162)n g/mol (2009)                                                                                                                                                                                                               |
| 63% mol TAG y 37% mol of total phospholipids (PC, PG, PE; Tsuzuki <i>et al.</i> , 1990). Of the total phospholipids 32% is PE, 13% PG and 55% PC (Tsuzuki <i>et al.</i> , 1990). MM LIPID = 884 g/mol (Sialve <i>et al.</i> , 2009). Because the MM of phospholipids and glycerolipids is very similar, the mass% is taken as% mol. |

Asn and Gln are omitted (Fowden 1951a, 1951b). The value of 9.1 mmol of total amino acid is multiplied by each mole fraction of individual amino acid (Stephanopoulos et al., 1998). The value of PRO is in grams, the MM of PRO is taken as 127.89 g/mol (Fowden 1951a,b; Sialve et al. takes value from 109.5 g/mol, 2009)

Razón de 2.5 Chla / Chlb (El-Sheekh y Fathy, 2009)

For biomass composition most metabolites are obtained from Sialve et al. (2009). Total nucleic acids of 3%, (90% RNA; Janczyk et al.,2005). 1.3 % CHL, MM Chla = 892.5, MM Chlb = 906.5 (Kralovec, 2005; El-Sheekh y Fathy, 2009)

(Kanehisa, 2017)

(Oberhardt, et al. 2008)

(Kanehisa, 2017)

(Kanehisa 2017)

[illegible]

[illegible]



[illegible]

|                  |
|------------------|
| (Kanehisa, 2017) |
|                  |
| (Kanehisa, 2017) |
| (Kanehisa, 2017) |
| (Kanehisa, 2017) |
|                  |
|                  |
| (Kanehisa, 2017) |
|                  |
|                  |
|                  |
|                  |
|                  |
|                  |
|                  |
|                  |
| (Kanehisa, 2017) |
|                  |

[illegible]
